# Supplementary material
Source: publisher figshare collection journal article supplement (https://gsapubs.figshare.com/ndownloader/files/23317157)
Supplement: Supplementary file 1 [file 23317157]

## Sheet: Reid Table S1
TABLE D1. 40Ar/39Ar AGE DATA FOR EASTERN TAURIDES-KIRSEHIR MAFIC LAVAS
	Relative Isotopic Abundances (x 10-14)										Backgrounds										Derived Results
Watts	40Ar		39Ar		38Ar		37Ar		36Ar		40Ar bkgd		39Ar bkgd		38Ar bkgd		37Ar bkgd		36Ar bkgd		39Ar Mol	Ca/K		Cl/K		40Ar*/39Ar		%40Ar*		Age (Ma)			Plateau Age (Ma) ±2s		Integrated Age (Ma) ±2s
	±1s		±1s		±1s		±1s		±1s		±1s		±1s		±1s		±1s		±1s		x 10-14	±1s		±1s		±1s		±1s		±1s and 1s w/J factor
M12SAR03 (lat=39.481383, long=36.275800), whole rock, J = 0.0000596 ± 0.0000013
0.3	-0.5874	0.542498	-0.0786829	0.250151	-0.112082	0.156751	0.0919102	0.157276	-0.0013862	0.0028578	1.234	0.54	0.023	0.24	-0.001	0.15	-0.032	0.15	0.00705	0.0028	-0.000239861	-4.19396	15.1423	4.08289	0.0004391	2.07421	14.4236	27.8294	174.075	0.226293	1.57349	1.5735	16	2
0.5	-0.415	0.545462	-0.125177	0.263709	0.0215657	0.155648	0.061766	0.155866	-0.001344	0.0028446	1.234	0.54	0.023	0.24	-0.001	0.15	-0.032	0.15	0.00705	0.0028	-0.000381598	-1.77201	5.82507	-0.542885	0.0001689	0.041102	8.05914	1.24077	243.278	0.0044844	0.87929	0.87929
0.7	4.9608	0.542794	0.356656	0.267979	0.143343	0.156751	0.0977223	0.155089	0.0152488	0.00288	1.234	0.54	0.023	0.24	-0.001	0.15	-0.032	0.15	0.00705	0.0028	0.00108725	0.984207	1.72819	1.10455	5.01e-05	1.18761	2.98845	8.53735	20.523	0.12957	0.326032	0.326045
0.9	270.633	0.553173	1.47133	0.272544	0.323288	0.157336	2.70923	0.155866	0.61646	0.0047813	1.234	0.54	0.023	0.24	-0.001	0.15	-0.032	0.15	0.00705	0.0028	0.00448529	6.61575	1.28322	0.370881	3.72e-05	59.2107	11.0418	32.126	0.569549	6.44881	1.20048	1.20913
1.1	268.777	0.555428	1.82044	0.248279	0.223472	0.156751	4.73648	0.155343	0.123491	0.0032407	1.234	0.54	0.023	0.24	-0.001	0.15	-0.032	0.15	0.00705	0.0028	0.00554952	9.35025	1.31159	0.281893	3.8e-05	128.111	17.5383	86.5163	0.452039	13.9245	1.89902	1.92433
1.3	313.673	0.560446	1.96578	0.247054	0.132758	0.156466	4.08424	0.154601	0.054995	0.003051	1.234	0.54	0.023	0.24	-0.001	0.15	-0.032	0.15	0.00705	0.0028	0.0059926	7.46827	0.980241	0.14348	2.84e-05	151.838	19.1384	94.9379	0.380898	16.4917	2.06936	2.10186
1.5	321.447	0.557853	1.86713	0.247292	0.208336	0.157638	2.88035	0.155089	0.0538817	0.0030127	1.234	0.54	0.023	0.24	-0.001	0.15	-0.032	0.15	0.00705	0.0028	0.00569187	5.54645	0.792984	0.27061	2.3e-05	164.021	21.7718	95.1148	0.36839	17.8086	2.35241	2.38574
1.7	236.938	0.555428	1.46279	0.248796	0.0388776	0.155915	2.08852	0.155089	0.0394283	0.0030114	1.234	0.54	0.023	0.24	-0.001	0.15	-0.032	0.15	0.00705	0.0028	0.00445924	5.13456	0.952908	0.0251706	2.76e-05	154.351	26.308	95.1482	0.498771	16.7635	2.84417	2.86868
1.9	175.221	0.553173	1.03639	0.249598	-0.092594	0.155915	1.65241	0.155089	0.0389268	0.0030113	1.234	0.54	0.023	0.24	-0.001	0.15	-0.032	0.15	0.00705	0.0028	0.00315939	5.73511	1.48239	-0.3167	4.3e-05	158.334	38.2197	93.4906	0.670973	17.1941	4.13097	4.14876
2.5	245.43	0.55109	1.55339	0.248536	0.0661809	0.154882	2.86892	0.156137	0.100843	0.0032874	1.234	0.54	0.023	0.24	-0.001	0.15	-0.032	0.15	0.00705	0.0028	0.00473545	6.64482	1.12297	0.0509545	3.26e-05	139.139	22.3234	87.8874	0.499368	15.1182	2.41556	2.43904
3	140.063	0.549181	0.593102	0.24659	-0.0335356	0.155915	3.00604	0.155089	0.130211	0.0032422	1.234	0.54	0.023	0.24	-0.001	0.15	-0.032	0.15	0.00705	0.0028	0.00180805	18.2395	7.64146	-0.320478	0.0002216	172.294	72.1002	72.5269	0.844089	18.7022	7.78652	7.79769
4	180.678	0.55109	0.426894	0.25975	-0.185386	0.157638	8.88209	0.155343	0.243481	0.0034906	1.234	0.54	0.023	0.24	-0.001	0.15	-0.032	0.15	0.00705	0.0028	0.00130137	74.8929	45.5884	-1.60461	0.0013221	262.238	163.707	60.4136	0.678221	28.3902	17.5863	17.5977
5	203.269	0.55109	0.732188	0.243948	0.0244345	0.15417	9.25338	0.156414	0.258004	0.003677	1.234	0.54	0.023	0.24	-0.001	0.15	-0.032	0.15	0.00705	0.0028	0.00223205	45.5013	15.1795	-0.131031	0.0004402	176.749	59.8275	62.706	0.627958	19.1833	6.45943	6.47358
6	185.743	0.55109	0.534189	0.246142	0.170646	0.154639	9.57728	0.154136	0.227773	0.003485	1.234	0.54	0.023	0.24	-0.001	0.15	-0.032	0.15	0.00705	0.0028	0.00162846	64.5646	29.7679	0.658914	0.0008633	227.674	107.257	64.0711	0.662017	24.6733	11.5456	11.5587
7	173.688	0.553173	0.781762	0.246142	0.023841	0.154639	10.3591	0.155344	0.214714	0.0034807	1.234	0.54	0.023	0.24	-0.001	0.15	-0.032	0.15	0.00705	0.0028	0.00238317	47.7303	15.0451	-0.0967547	0.0004363	144.209	46.1705	63.8803	0.70794	15.6666	4.99449	5.00673
M12SAR05 (lat=39.467067, long=36.261233), whole rock, J = 0.0000596 ± 0.0000013
0.1	-0.3301	0.542595	0.255918	0.249059	0.152147	0.155915	0.245389	0.155089	-0.0007292	0.0028539	1.234	0.54	0.023	0.24	-0.001	0.15	-0.032	0.15	0.00705	0.0028	0.000780157	3.46913	4.02562	1.68806	0.0001167	-0.301233	3.96263	23.3317	308.473	-0.0328664	0.432351	0.432351	14.9	0.8
0.3	-0.3765	0.546649	0.0131138	0.250718	-0.32764	0.156466	0.028371	0.156413	-0.0024152	0.0028578	1.234	0.54	0.023	0.24	-0.001	0.15	-0.032	0.15	0.00705	0.0028	3.9977e-05	7.8291	155.781	-72.376	0.0045176	26.1627	507.469	-90.9069	299.818	2.85226	55.2812	55.2813
0.5	-0.733	0.547781	0.0564291	0.24682	0.0723143	0.155387	0.0266963	0.154601	-0.0019438	0.0028772	1.234	0.54	0.023	0.24	-0.001	0.15	-0.032	0.15	0.00705	0.0028	0.000172022	1.71244	12.4277	3.69711	0.0003604	-2.61943	21.3948	20.1581	139.836	-0.285815	2.33465	2.33466
0.7	1.3022	0.545748	0.311751	0.248536	0.0312604	0.156751	0.0088659	0.155089	0.0028596	0.0028662	1.234	0.54	0.023	0.24	-0.001	0.15	-0.032	0.15	0.00705	0.0028	0.000950363	0.102964	1.80298	0.248312	5.23e-05	1.44358	3.45323	34.5661	79.2918	0.157495	0.376732	0.376749
0.9	446.925	0.563205	2.88971	0.25975	0.0386797	0.156466	1.08509	0.155342	0.272097	0.0036823	1.234	0.54	0.023	0.24	-0.001	0.15	-0.032	0.15	0.00705	0.0028	0.00880918	1.35982	0.229865	-0.0500225	6.66609e-06	126.628	11.3956	81.8552	0.295051	13.7639	1.234	1.27174
1.1	994.105	0.599333	6.9233	0.259372	0.114456	0.157041	1.53243	0.157276	0.130291	0.003346	1.234	0.54	0.023	0.24	-0.001	0.15	-0.032	0.15	0.00705	0.0028	0.0211055	0.801745	0.0875955	0.0002723	2.54027e-06	138.006	5.17436	96.1075	0.130749	14.9956	0.559942	0.652456
1.3	994.662	0.595063	7.0446	0.247055	0.091209	0.156188	1.18882	0.154601	0.0733501	0.0031838	1.234	0.54	0.023	0.24	-0.001	0.15	-0.032	0.15	0.00705	0.0028	0.0214752	0.611407	0.0823508	-0.0055336	2.38817e-06	138.107	4.84704	97.8142	0.127047	15.0065	0.524518	0.622452
1.5	409.208	0.560446	2.81222	0.247533	0.0649938	0.155648	0.54358	0.155089	0.0660783	0.0031367	1.234	0.54	0.023	0.24	-0.001	0.15	-0.032	0.15	0.00705	0.0028	0.00857295	0.700463	0.209144	0.0167849	6.06518e-06	138.524	12.202	95.1967	0.296917	15.0516	1.3204	1.36252
1.7	204.679	0.549181	1.34615	0.248796	0.101992	0.156751	0.30686	0.156137	0.0443932	0.0030499	1.234	0.54	0.023	0.24	-0.001	0.15	-0.032	0.15	0.00705	0.0028	0.0041037	0.82626	0.447294	0.164272	1.3e-05	142.241	26.3082	93.5451	0.577084	15.4538	2.84623	2.86707
1.9	163.738	0.549181	1.27264	0.263709	0.0628175	0.156751	0.490385	0.155342	0.0297061	0.0029687	1.234	0.54	0.023	0.24	-0.001	0.15	-0.032	0.15	0.00705	0.0028	0.00387959	1.39703	0.528818	0.0930109	1.53e-05	121.774	25.2587	94.6237	0.71162	13.2382	2.73599	2.75193
2.5	423.224	0.566127	2.99591	0.257529	0.0809208	0.154639	1.28802	0.155089	0.0605116	0.0031823	1.234	0.54	0.023	0.24	-0.001	0.15	-0.032	0.15	0.00705	0.0028	0.00913294	1.55908	0.230656	0.0299377	6.68903e-06	135.336	11.6455	95.7719	0.29108	14.7066	1.26041	1.30251
3	717.99	0.579396	5.05716	0.249598	0.0113764	0.155648	7.17293	0.154601	0.113771	0.0032388	1.234	0.54	0.023	0.24	-0.001	0.15	-0.032	0.15	0.00705	0.0028	0.0154166	5.14474	0.277077	-0.0429288	8.03523e-06	135.652	6.71046	95.4019	0.174908	14.7408	0.726272	0.797416
4	597.353	0.566127	4.03975	0.247292	-0.116039	0.157336	14.5702	0.156139	0.105467	0.0032373	1.234	0.54	0.023	0.24	-0.001	0.15	-0.032	0.15	0.00705	0.0028	0.012315	13.0854	0.813196	-0.134305	2.36e-05	141.144	8.68272	95.0531	0.208157	15.3351	0.939425	0.999899
5	450.312	0.563205	3.11175	0.249598	0.0484733	0.157041	11.7929	0.155603	0.0849249	0.0031393	1.234	0.54	0.023	0.24	-0.001	0.15	-0.032	0.15	0.00705	0.0028	0.00948607	13.7528	1.11796	-0.0064701	3.24e-05	137.677	11.1002	94.7184	0.270305	14.9599	1.20122	1.24683
6	876.466	0.586941	5.93867	0.247292	0.0467916	0.156188	23.8649	0.156702	0.184925	0.0035913	1.234	0.54	0.023	0.24	-0.001	0.15	-0.032	0.15	0.00705	0.0028	0.0181039	14.5864	0.614897	-0.0308524	1.78e-05	139.478	5.84031	94.0635	0.15321	15.1548	0.631953	0.716878
7	516.652	0.563205	3.5606	0.24682	-0.0276001	0.155132	13.4447	0.156697	0.133139	0.0032936	1.234	0.54	0.023	0.24	-0.001	0.15	-0.032	0.15	0.00705	0.0028	0.0108544	13.709	0.963643	-0.0796361	2.79e-05	135.034	9.40935	92.6528	0.241603	14.6739	1.01841	1.06985
M12SAR09 (lat=39.427867, long=36.258633), whole rock, J = 0.0000565 ± 0.0000011
0.3	0.0531	0.542794	0.0828555	0.248796	0.187166	0.155648	-0.0454133	0.155342	-0.0011505	0.0028619	1.234	0.54	0.023	0.24	-0.001	0.15	-0.032	0.15	0.00705	0.0028	0.000252572	-1.77102	8.06102	6.51995	0.0002338	4.75186	18.7739	742.038	7821.16	0.491401	1.9412	1.94122	14.3	0.9
0.5	-0.2993	0.546963	-0.0687482	0.248536	0.0126624	0.156466	0.0888564	0.155602	-0.0023701	0.0028619	1.234	0.54	0.023	0.24	-0.001	0.15	-0.032	0.15	0.00705	0.0028	-0.000209568	-4.17734	16.7802	-0.590524	0.0004866	-6.08622	26.4552	-140.019	424.748	-0.629582	2.7371	2.73712
0.7	-0.2683	0.546805	0.215881	0.249598	-0.124844	0.155648	0.115651	0.154601	-0.000332	0.0028578	1.234	0.54	0.023	0.24	-0.001	0.15	-0.032	0.15	0.00705	0.0028	0.00065808	1.73188	3.06095	-1.71326	8.88e-05	-0.72936	4.77213	58.6625	396.247	-0.0754364	0.493583	0.493585
0.9	297.828	0.553173	1.11448	0.24682	-0.0499572	0.155387	0.951019	0.155089	0.315978	0.0037006	1.234	0.54	0.023	0.24	-0.001	0.15	-0.032	0.15	0.00705	0.0028	0.0033973	2.75939	0.758918	-0.322289	2.2e-05	182.824	40.5425	68.3618	0.433908	18.8118	4.15027	4.16616
1.1	724.39	0.579396	3.81125	0.249873	0.223076	0.156466	2.65752	0.155089	0.383742	0.0039941	1.234	0.54	0.023	0.24	-0.001	0.15	-0.032	0.15	0.00705	0.0028	0.011618	2.25535	0.197959	0.0773541	5.7408e-06	160.181	10.5155	84.2277	0.195046	16.4924	1.07782	1.124
1.3	741.125	0.579396	4.78684	0.248536	0.177274	0.156466	2.30406	0.154842	0.19671	0.0035946	1.234	0.54	0.023	0.24	-0.001	0.15	-0.032	0.15	0.00705	0.0028	0.0145919	1.55726	0.132249	0.0475755	3.83524e-06	142.663	7.41545	92.1127	0.179648	14.6959	0.760816	0.812186
1.5	276.835	0.553173	1.72427	0.249327	-0.0234453	0.157336	1.402	0.155089	0.121775	0.0032912	1.234	0.54	0.023	0.24	-0.001	0.15	-0.032	0.15	0.00705	0.0028	0.00525616	2.6313	0.479053	-0.115323	1.39e-05	139.661	20.2233	86.9266	0.442873	14.3879	2.07524	2.09382
1.7	201.008	0.55109	1.43616	0.249059	-0.088637	0.159903	0.952004	0.156695	0.0792579	0.0031846	1.234	0.54	0.023	0.24	-0.001	0.15	-0.032	0.15	0.00705	0.0028	0.00437791	2.14573	0.513031	-0.246433	1.49e-05	123.63	21.4691	88.2831	0.59798	12.7421	2.20506	2.2188
1.9	152.19	0.547449	1.08388	0.247533	0.068753	0.154882	0.609779	0.155089	0.0623371	0.0030518	1.234	0.54	0.023	0.24	-0.001	0.15	-0.032	0.15	0.00705	0.0028	0.00330403	1.82155	0.62265	0.115154	1.81e-05	123.363	28.2077	87.8191	0.766655	12.7147	2.89721	2.90764
2.5	541.969	0.566127	3.72979	0.247533	0.119007	0.155387	2.88015	0.154135	0.128526	0.0032418	1.234	0.54	0.023	0.24	-0.001	0.15	-0.032	0.15	0.00705	0.0028	0.0113697	2.50087	0.213213	0.0363876	6.18319e-06	135.202	8.98547	92.9831	0.228585	13.9302	0.922285	0.960856
3	449.33	0.563205	3.0894	0.247292	0.129592	0.156188	9.12905	0.154843	0.0991776	0.0031877	1.234	0.54	0.023	0.24	-0.001	0.15	-0.032	0.15	0.00705	0.0028	0.00941755	9.57246	0.783244	0.0671473	2.27e-05	136.625	10.9774	93.652	0.272749	14.0763	1.12665	1.15909
4	762.188	0.575847	5.29739	0.249327	0.089923	0.157638	26.2373	0.156421	0.190993	0.0034734	1.234	0.54	0.023	0.24	-0.001	0.15	-0.032	0.15	0.00705	0.0028	0.0161483	16.0487	0.761386	-0.0070922	2.21e-05	134.406	6.36428	92.928	0.170933	13.8485	0.65327	0.706081
5	537.672	0.560446	3.7588	0.248536	-0.0152345	0.157041	21.2802	0.155348	0.142789	0.0034039	1.234	0.54	0.023	0.24	-0.001	0.15	-0.032	0.15	0.00705	0.0028	0.0114581	18.3494	1.22065	-0.0690035	3.54e-05	133.173	8.86566	92.5419	0.236624	13.722	0.910092	0.948026
6	345.514	0.553173	2.37112	0.248536	-0.0882413	0.156751	14.8987	0.157279	0.0916049	0.0030967	1.234	0.54	0.023	0.24	-0.001	0.15	-0.032	0.15	0.00705	0.0028	0.00722799	20.3704	2.14599	-0.165408	6.22e-05	135.836	14.3436	92.5971	0.345464	13.9954	1.4722	1.49689
M12SAR18 (lat=39.486550, long=36.267133), whole rock, J = 0.0000565 ± 0.0000011
0.1	0.193	0.54812	-0.120607	0.249872	0.197356	0.156751	-0.165891	0.155342	-0.0018104	0.0028704	1.234	0.54	0.023	0.24	-0.001	0.15	-0.032	0.15	0.00705	0.0028	-0.000367653	4.46148	10.1435	-4.79	0.0002942	-5.95125	14.9607	371.408	1179.2	-0.615618	1.54785	1.5479	15.3	0.9
0.3	-0.2254	0.547449	0.0353676	0.248796	0.146211	0.156466	0.355327	0.155602	-0.0008746	0.0028619	1.234	0.54	0.023	0.24	-0.001	0.15	-0.032	0.15	0.00705	0.0028	0.000107813	32.5958	229.742	11.9645	0.0066625	2.29497	33.2878	-35.6223	458.529	0.237344	3.44238	3.44239
0.5	-0.4504	0.547123	-0.401064	0.251597	-0.0367012	0.158257	-0.158897	0.155089	-0.0004634	0.0028619	1.234	0.54	0.023	0.24	-0.001	0.15	-0.032	0.15	0.00705	0.0028	-0.00122258	1.28574	1.49178	0.227356	4.33e-05	0.826675	2.58353	73.5937	242.395	0.0854977	0.267192	0.267197
0.7	0.2279	0.546963	0.110673	0.248536	-0.0182022	0.155915	-0.175939	0.155342	0.0002247	0.0028749	1.234	0.54	0.023	0.24	-0.001	0.15	-0.032	0.15	0.00705	0.0028	0.000337369	-5.16043	12.4522	-0.515662	0.0003611	1.25851	9.60446	61.2328	470.233	0.130158	0.993281	0.993284
0.9	478.871	0.560446	0.77898	0.2513	0.0391744	0.156188	0.481322	0.155089	1.5122	0.0066155	1.234	0.54	0.023	0.24	-0.001	0.15	-0.032	0.15	0.00705	0.0028	0.0023746	2.0063	0.914781	-0.953085	2.65e-05	35.2463	11.6799	5.73069	0.428813	3.64176	1.2056	1.20767
1.1	496.337	0.566127	1.77454	0.248796	0.0257205	0.155648	3.33861	0.155089	0.863421	0.0053493	1.234	0.54	0.023	0.24	-0.001	0.15	-0.032	0.15	0.00705	0.0028	0.00540941	6.11054	0.902517	-0.261154	2.62e-05	134.907	18.9775	48.1426	0.34581	13.9	1.94792	1.9664
1.3	585.056	0.566127	2.37509	0.248536	-0.0719186	0.157041	4.68604	0.155089	0.627553	0.0042842	1.234	0.54	0.023	0.24	-0.001	0.15	-0.032	0.15	0.00705	0.0028	0.0072401	6.40968	0.703473	-0.269375	2.04e-05	168.009	17.6288	68.0703	0.248022	17.2946	1.80613	1.83681
1.5	822.495	0.586941	3.25819	0.24682	0.145222	0.156466	7.02221	0.156984	0.853602	0.0051884	1.234	0.54	0.023	0.24	-0.001	0.15	-0.032	0.15	0.00705	0.0028	0.00993209	7.00357	0.553167	-0.0510888	1.6e-05	174.858	13.2872	69.1166	0.207376	17.9961	1.3608	1.40454
1.7	651.33	0.566127	3.27508	0.248796	0.402032	0.157041	6.85691	0.156414	0.610362	0.0046275	1.234	0.54	0.023	0.24	-0.001	0.15	-0.032	0.15	0.00705	0.0028	0.00998357	6.8052	0.539771	0.216949	1.57e-05	143.787	10.9576	72.1482	0.23769	14.8113	1.12417	1.1601
1.9	593.412	0.572451	3.05492	0.249059	0.291533	0.155387	6.46258	0.155867	0.478967	0.0046226	1.234	0.54	0.023	0.24	-0.001	0.15	-0.032	0.15	0.00705	0.0028	0.00931247	6.87781	0.584751	0.153901	1.7e-05	148.007	12.1045	76.0324	0.262286	15.2441	1.24154	1.27606
2.5	919.815	0.586941	5.48475	0.24906	-0.027699	0.155648	8.30561	0.156984	0.29311	0.0038859	1.234	0.54	0.023	0.24	-0.001	0.15	-0.032	0.15	0.00705	0.0028	0.0167195	4.92459	0.242221	-0.0810277	7.02442e-06	152.154	6.92475	90.5936	0.152747	15.6694	0.710094	0.772042
3	513.054	0.566127	3.56169	0.248027	0.278375	0.154639	3.8293	0.155866	0.0445437	0.00305	1.234	0.54	0.023	0.24	-0.001	0.15	-0.032	0.15	0.00705	0.0028	0.0108573	3.49728	0.282093	0.182548	8.18071e-06	140.583	9.80603	97.4977	0.235092	14.4825	1.00621	1.04448
4	364.679	0.560446	2.01396	0.248027	0.0014839	0.156188	11.6077	0.156985	0.0821766	0.0031389	1.234	0.54	0.023	0.24	-0.001	0.15	-0.032	0.15	0.00705	0.0028	0.00613927	18.7531	2.32339	-0.0566346	6.74e-05	170.626	21.1536	93.6524	0.332344	17.5626	2.16694	2.19336
5	410.83	0.560446	2.88554	0.248027	0.0956606	0.154639	14.5679	0.156139	0.0752558	0.0030534	1.234	0.54	0.023	0.24	-0.001	0.15	-0.032	0.15	0.00705	0.0028	0.00879613	16.4309	1.42326	0.0452862	4.13e-05	135.919	11.7538	94.9549	0.291062	14.0038	1.20638	1.23643
6	728.452	0.583095	4.8083	0.248536	0.172723	0.156751	24.6552	0.156702	0.124283	0.0032409	1.234	0.54	0.023	0.24	-0.001	0.15	-0.032	0.15	0.00705	0.0028	0.0146574	16.6923	0.869308	0.0534588	2.52e-05	145.183	7.55045	95.3109	0.173032	14.9545	0.774558	0.826802
M12SAR19 (lat=39.486550, long=36.267133), whole rock, J = 0.0000565 ± 0.0000011
0.1	0.015	0.547614	0.173063	0.249059	-0.0400647	0.155132	0.141461	0.156137	-0.001984	0.0028598	1.234	0.54	0.023	0.24	-0.001	0.15	-0.032	0.15	0.00705	0.0028	0.000527556	2.66231	4.82852	-0.702253	0.00014	3.60589	7.83556	4157.33	151925	0.372905	0.810236	0.810268	13.9	1.4
0.3	-0.3009	0.545604	0.115541	0.248279	0.216349	0.155915	0.249921	0.156137	-0.002346	0.0028578	1.234	0.54	0.023	0.24	-0.001	0.15	-0.032	0.15	0.00705	0.0028	0.000352209	7.047	15.7699	5.40336	0.0004573	3.75369	11.9405	-143.82	425.829	0.388188	1.2347	1.23473
0.5	0.3113	0.547285	0.0699404	0.250151	0.0086065	0.156188	0.178008	0.155866	-0.0014353	0.0028661	1.234	0.54	0.023	0.24	-0.001	0.15	-0.032	0.15	0.00705	0.0028	0.000213203	8.29392	30.5403	0.331031	0.0008857	10.9127	41.7623	244.538	539.751	1.12831	4.31665	4.3167
0.7	-0.4521	0.547123	0.220054	0.249059	0.0655874	0.156188	0.0443297	0.155602	0.0014975	0.0028599	1.234	0.54	0.023	0.24	-0.001	0.15	-0.032	0.15	0.00705	0.0028	0.000670801	0.656635	2.42171	0.823103	7.02e-05	-4.0579	6.50744	197.505	327.812	-0.419741	0.673194	0.673243
0.9	83.1613	0.548293	0.699702	0.252507	0.249489	0.156751	0.985301	0.155866	0.188315	0.0035315	1.234	0.54	0.023	0.24	-0.001	0.15	-0.032	0.15	0.00705	0.0028	0.00213294	4.59118	1.80905	0.849506	5.25e-05	38.725	14.0997	32.538	1.44523	4.0008	1.45509	1.45716
1.1	190.468	0.549181	1.18034	0.247292	0.0817122	0.155915	3.16701	0.155602	0.124464	0.0032918	1.234	0.54	0.023	0.24	-0.001	0.15	-0.032	0.15	0.00705	0.0028	0.0035981	8.75026	1.88299	0.106095	5.46e-05	130.566	27.4521	80.6897	0.635314	13.4544	2.81847	2.83047
1.3	313.356	0.557853	2.05996	0.248279	0.159764	0.155648	4.39208	0.156137	0.0791776	0.0031384	1.234	0.54	0.023	0.24	-0.001	0.15	-0.032	0.15	0.00705	0.0028	0.00627949	6.95508	0.873974	0.1668	2.53e-05	141.203	17.0668	92.6246	0.385159	14.5461	1.75118	1.77364
1.5	411.426	0.560446	2.87828	0.246142	0.12791	0.155915	4.72564	0.156137	0.0958075	0.003141	1.234	0.54	0.023	0.24	-0.001	0.15	-0.032	0.15	0.00705	0.0028	0.00877402	5.3571	0.491126	0.0735122	1.42e-05	133.417	11.4363	93.1854	0.294366	13.747	1.17396	1.20371
1.7	429.945	0.557853	3.01638	0.248027	-0.0340303	0.155915	3.32472	0.154842	0.0625076	0.0030518	1.234	0.54	0.023	0.24	-0.001	0.15	-0.032	0.15	0.00705	0.0028	0.00919498	3.59736	0.339952	-0.0812716	9.8586e-06	136.622	11.2532	95.7518	0.277855	14.076	1.15496	1.18663
1.9	200.533	0.55109	1.21581	0.247778	0.0560906	0.157638	1.51568	0.156413	0.024323	0.0029751	1.234	0.54	0.023	0.24	-0.001	0.15	-0.032	0.15	0.00705	0.0028	0.00370622	4.06974	0.929673	0.0856229	2.7e-05	159.304	32.5215	96.4696	0.584889	16.4025	3.33356	3.34861
2.5	156.992	0.55109	1.05636	0.245708	-0.0842842	0.156466	1.67645	0.154601	0.041986	0.0030497	1.234	0.54	0.023	0.24	-0.001	0.15	-0.032	0.15	0.00705	0.0028	0.00322015	5.18221	1.29666	-0.290227	3.76e-05	137.153	31.9732	92.1423	0.751252	14.1304	3.28143	3.2928
3	101.002	0.54795	0.828952	0.245923	0.14354	0.157638	1.54927	0.155342	0.054313	0.0030918	1.234	0.54	0.023	0.24	-0.001	0.15	-0.032	0.15	0.00705	0.0028	0.00252694	6.10442	1.91162	0.429144	5.54e-05	102.7	30.558	84.1311	1.15685	10.5912	3.14226	3.14894
4	157.567	0.549181	0.445075	0.247292	-0.14077	0.156466	6.55951	0.15509	0.165487	0.0035254	1.234	0.54	0.023	0.24	-0.001	0.15	-0.032	0.15	0.00705	0.0028	0.00135675	48.1499	26.7772	-1.15536	0.0007765	248.756	140.513	69.141	0.791213	25.5486	14.3312	14.3397
5	333.584	0.555428	1.67797	0.247292	0.159764	0.157638	21.3091	0.156142	0.402989	0.0038711	1.234	0.54	0.023	0.24	-0.001	0.15	-0.032	0.15	0.00705	0.0028	0.00511506	41.5001	6.12365	0.109432	0.0001776	130.418	19.5078	64.6989	0.399525	13.4392	2.00285	2.01966
6	179.025	0.55109	0.799247	0.244312	0.071325	0.155132	13.5553	0.155604	0.207222	0.0034783	1.234	0.54	0.023	0.24	-0.001	0.15	-0.032	0.15	0.00705	0.0028	0.00243639	55.4381	16.9581	0.0823752	0.0004918	151.414	47.1865	66.3506	0.688028	15.5935	4.83891	4.8483
M12SAR26 (lat=39.518983, long=36.31445), whole rock, J = 0.0000565 ± 0.0000011
0.1	-0.4967	0.54795	-0.126072	0.250718	-0.120689	0.157041	-0.004827	0.154135	-0.0006179	0.0028705	1.234	0.54	0.023	0.24	-0.001	0.15	-0.032	0.15	0.00705	0.0028	-0.000384314	0.128333	4.10586	2.7356	0.0001191	2.49637	9.47411	63.3717	216.432	0.258171	0.979732	0.979745	14.5	1
0.3	-0.4411	0.545322	0.0014902	0.249327	-0.0140474	0.156188	0.161064	0.154842	-0.0017533	0.0028619	1.234	0.54	0.023	0.24	-0.001	0.15	-0.032	0.15	0.00705	0.0028	4.54272e-06	362.357	60627.1	-26.7074	1.75818	77.8902	14859.1	-23.1142	231.609	8.0382	1530.09	1530.09
0.5	-0.646	0.545894	0.0184786	0.246364	0.067368	0.156188	0.118212	0.155602	-0.0027904	0.0028538	1.234	0.54	0.023	0.24	-0.001	0.15	-0.032	0.15	0.00705	0.0028	5.63297e-05	21.4528	287.408	10.617	0.0083348	11.05	158.316	-31.3861	158.902	1.1425	16.3638	16.3638
0.7	4.5111	0.548293	0.0226511	0.248796	0.038284	0.156188	0.195543	0.154842	0.0117914	0.0029243	1.234	0.54	0.023	0.24	-0.001	0.15	-0.032	0.15	0.00705	0.0028	6.90493e-05	28.9564	318.877	4.57997	0.0092474	45.2566	504.077	22.5074	23.0214	4.67473	52.0017	52.0018
0.9	563.23	0.566127	0.870976	0.24682	0.453176	0.156188	2.27224	0.155602	1.6214	0.0068942	1.234	0.54	0.023	0.24	-0.001	0.15	-0.032	0.15	0.00705	0.0028	0.00265507	8.75272	2.55177	0.453644	7.4e-05	91.4461	26.1068	14.1023	0.379308	9.43355	2.68624	2.69245
1.1	780.249	0.579396	1.01612	0.247292	0.411133	0.155648	2.90409	0.154365	1.90375	0.0076163	1.234	0.54	0.023	0.24	-0.001	0.15	-0.032	0.15	0.00705	0.0028	0.00309753	9.59104	2.38918	0.111679	6.93e-05	209.491	51.2008	27.1994	0.30144	21.5396	5.23354	5.25003
1.3	600.574	0.575847	1.87577	0.24659	0.257008	0.155387	2.64136	0.156137	0.98314	0.0054545	1.234	0.54	0.023	0.24	-0.001	0.15	-0.032	0.15	0.00705	0.0028	0.00571807	4.72672	0.681307	0.07348	1.98e-05	164.095	21.626	51.18	0.291788	16.8934	2.21614	2.24008
1.5	434.02	0.553173	1.63684	0.247778	0.135626	0.155915	1.99631	0.154365	0.608867	0.0046265	1.234	0.54	0.023	0.24	-0.001	0.15	-0.032	0.15	0.00705	0.0028	0.00498972	4.09493	0.696062	-0.0003723	2.02e-05	154.433	23.4273	58.1731	0.350784	15.9031	2.40203	2.42164
1.7	416.694	0.557853	1.62969	0.248027	0.214074	0.155648	1.25236	0.155602	0.59325	0.0043984	1.234	0.54	0.023	0.24	-0.001	0.15	-0.032	0.15	0.00705	0.0028	0.00496792	2.58084	0.507053	0.144523	1.47e-05	147.201	22.4395	57.5312	0.35099	15.1614	2.30168	2.32028
1.9	304.964	0.555428	1.67291	0.248027	-0.0209721	0.155915	0.5886	0.155089	0.180692	0.0033585	1.234	0.54	0.023	0.24	-0.001	0.15	-0.032	0.15	0.00705	0.0028	0.00509966	1.18194	0.357344	-0.132765	1.04e-05	150.122	22.2767	82.3336	0.404729	15.461	2.2846	2.30409
2.5	718.605	0.583095	4.793	0.246591	0.141166	0.155132	1.88825	0.155602	0.178325	0.0034128	1.234	0.54	0.023	0.24	-0.001	0.15	-0.032	0.15	0.00705	0.0028	0.0146109	1.32376	0.1286	0.0277081	3.72939e-06	138.904	7.15373	92.6236	0.179849	14.3102	0.73412	0.78458
3	446.444	0.563205	3.05949	0.247292	-0.0262152	0.156466	1.26793	0.154365	0.0758677	0.003138	1.234	0.54	0.023	0.24	-0.001	0.15	-0.032	0.15	0.00705	0.0028	0.00932651	1.39288	0.203548	-0.0757442	5.90289e-06	138.606	11.2142	94.9611	0.272624	14.2797	1.15083	1.18352
4	723.884	0.586941	4.86433	0.247533	0.227825	0.155387	4.68299	0.155602	0.138947	0.0033479	1.234	0.54	0.023	0.24	-0.001	0.15	-0.032	0.15	0.00705	0.0028	0.0148284	3.23654	0.1967	0.0829326	5.70429e-06	140.532	7.16307	94.3494	0.17749	14.4772	0.735011	0.786555
5	213.998	0.553173	1.46298	0.248279	0.0157291	0.156751	0.88285	0.155089	0.0217102	0.0029426	1.234	0.54	0.023	0.24	-0.001	0.15	-0.032	0.15	0.00705	0.0028	0.00445974	2.02927	0.495657	-0.014249	1.44e-05	141.988	24.1234	97.022	0.546214	14.6267	2.47513	2.49125
6	241.903	0.555428	1.47024	0.247778	0.0847789	0.156188	1.51647	0.156413	0.0470943	0.0029767	1.234	0.54	0.023	0.24	-0.001	0.15	-0.032	0.15	0.00705	0.0028	0.00448185	3.46936	0.6855	0.112443	1.99e-05	155.249	26.2043	94.2654	0.48437	15.9868	2.68664	2.70437
M12SAR29 (lat=39.509700, long=36.241683), whole rock, J = 0.0000596 ± 0.0000013
0.3	-0.4917	0.546494	-0.0317911	0.248279	0.290246	0.156751	-0.0256127	0.155089	-0.0031705	0.00285	1.234	0.54	0.023	0.24	-0.001	0.15	-0.032	0.15	0.00705	0.0028	-9.69167e-05	3.15579	31.186	-26.5621	0.0009044	-14.3974	116.974	-93.011	230.237	-1.5715	12.7734	12.7735	14.1	0.9
0.7	0.1874	0.542595	-0.206245	0.250151	0.0496604	0.156751	-0.0357593	0.154365	0.0005336	0.0028705	1.234	0.54	0.023	0.24	-0.001	0.15	-0.032	0.15	0.00705	0.0028	-0.000628747	0.679303	3.04595	-0.734073	8.83e-05	-0.116572	4.92129	12.8297	542.677	-0.0127187	0.536941	0.536941
0.9	1770.41	0.684105	0.31652	0.247533	0.978271	0.155915	-0.266372	0.156137	5.89189	0.0169084	1.234	0.54	0.023	0.24	-0.001	0.15	-0.032	0.15	0.00705	0.0028	0.000964927	-3.29797	3.22321	-1.25552	9.35e-05	35.5979	32.1196	0.637294	0.287755	3.87979	3.49699	3.49807
1.1	5229.7	1.2254	0.833224	0.245087	3.19004	0.155387	0.0992	0.155089	17.0939	0.0431548	1.234	0.54	0.023	0.24	-0.001	0.15	-0.032	0.15	0.00705	0.0028	0.00254013	0.466668	0.74239	-0.155506	2.15e-05	151.374	47.1636	2.412	0.247484	16.4416	5.09976	5.11296
1.3	3576.87	0.973499	1.65105	0.248796	2.14282	0.157638	0.373748	0.155602	11.2443	0.0296607	1.234	0.54	0.023	0.24	-0.001	0.15	-0.032	0.15	0.00705	0.0028	0.00503331	0.887521	0.392958	0.0014438	1.14e-05	133.151	20.7833	6.14581	0.249078	14.4701	2.2497	2.2728
1.5	1723.83	0.672012	2.33535	0.249598	0.892997	0.155648	0.579832	0.154842	4.78764	0.0141852	1.234	0.54	0.023	0.24	-0.001	0.15	-0.032	0.15	0.00705	0.0028	0.00711944	0.973669	0.280066	-0.0497383	8.12191e-06	126.123	13.6087	17.085	0.248851	13.7092	1.4737	1.50519
1.7	1283.86	0.617738	2.5556	0.247778	0.590979	0.156188	0.583379	0.155342	3.2319	0.0103198	1.234	0.54	0.023	0.24	-0.001	0.15	-0.032	0.15	0.00705	0.0028	0.00779089	0.895404	0.253742	-0.0584324	7.35851e-06	124.843	12.1701	24.8493	0.245063	13.5705	1.31801	1.35243
1.9	1390.09	0.627694	2.60081	0.247292	0.676351	0.157041	0.298585	0.155342	3.57649	0.0123699	1.234	0.54	0.023	0.24	-0.001	0.15	-0.032	0.15	0.00705	0.0028	0.0079287	0.450424	0.23822	-0.035369	6.90839e-06	123.926	11.8727	23.1882	0.269699	13.4712	1.28587	1.32063
2.5	4875.54	1.09275	5.75239	0.24906	2.71579	0.157336	1.01948	0.154601	13.8811	0.0368051	1.234	0.54	0.023	0.24	-0.001	0.15	-0.032	0.15	0.00705	0.0028	0.0175365	0.695496	0.109684	0.0118986	3.18083e-06	127.136	5.83095	15.0003	0.22652	13.8189	0.631401	0.702838
3	3444.42	0.940479	4.4738	0.246142	2.10137	0.154882	1.05849	0.155342	9.44931	0.0251768	1.234	0.54	0.023	0.24	-0.001	0.15	-0.032	0.15	0.00705	0.0028	0.0136386	0.928702	0.145558	0.169495	4.22117e-06	139.353	7.85414	18.0987	0.219991	15.1413	0.849866	0.914668
4	2911.61	0.845044	4.46833	0.24906	1.77472	0.157336	1.54553	0.155602	7.80002	0.0203783	1.234	0.54	0.023	0.24	-0.001	0.15	-0.032	0.15	0.00705	0.0028	0.013622	1.35799	0.156275	0.159655	4.53198e-06	130.515	7.40684	20.0255	0.211052	14.1847	0.801885	0.862222
5	2189.73	0.777946	3.545	0.247292	1.1231	0.156466	5.16923	0.155343	5.87298	0.0174895	1.234	0.54	0.023	0.24	-0.001	0.15	-0.032	0.15	0.00705	0.0028	0.0108071	5.72632	0.434946	-0.0244987	1.26e-05	123.491	8.75906	19.9586	0.241204	13.4241	0.948673	0.99496
6	1546.35	0.654599	2.01853	0.248027	0.848976	0.157945	3.02673	0.154842	4.14407	0.0131765	1.234	0.54	0.023	0.24	-0.001	0.15	-0.032	0.15	0.00705	0.0028	0.00615361	5.88986	0.783935	0.0596826	2.27e-05	153.612	19.0158	20.0171	0.25805	16.6836	2.0559	2.08936
7	1061.26	0.612944	1.66744	0.250151	0.548936	0.155915	1.84283	0.155602	2.84052	0.0093073	1.234	0.54	0.023	0.24	-0.001	0.15	-0.032	0.15	0.00705	0.0028	0.00508329	4.34213	0.747499	-0.0142348	2.17e-05	128.17	19.332	20.1136	0.268396	13.9308	2.09322	2.11623
CAT15-KS23 (lat=39.183442, long=36.056672), whole rock, J =0.0011132 ± 0.0000002
1.5	256.803	0.269785	2.26288	0.125799	0.153107	0.092921	1.1527	0.0909317	0.790812	0.0036503	1.327	0.26	0.027	0.12	0.011	0.087	0.0339	0.086	0.004508	0.00088	0.0120618	1.96064	0.189213	-0.0322277	5.31921e-06	9.22959	0.714109	8.13028	0.437322	18.7078	1.44008	1.44009	16.31	0.19
1.6	162.018	0.267761	2.05217	0.127714	0.201967	0.0922448	1.21828	0.0906166	0.482114	0.0027404	1.327	0.26	0.027	0.12	0.011	0.087	0.0339	0.086	0.004508	0.00088	0.0109386	2.28575	0.221677	0.119598	6.23183e-06	8.90733	0.695627	11.2776	0.531755	18.0578	1.40331	1.40331
1.7	131.429	0.262481	2.20655	0.126409	0.0358042	0.0919208	1.18677	0.0912563	0.373648	0.0022169	1.327	0.26	0.027	0.12	0.011	0.087	0.0339	0.086	0.004508	0.00088	0.0117616	2.07515	0.198984	-0.082843	5.59388e-06	9.09357	0.613177	15.2618	0.542741	18.4335	1.23673	1.23673
1.8	154.071	0.26661	2.3517	0.127378	0.162503	0.092921	1.08604	0.0909316	0.451771	0.00253	1.327	0.26	0.027	0.12	0.011	0.087	0.0339	0.086	0.004508	0.00088	0.0125352	1.78243	0.177743	0.0579898	4.99677e-06	8.23572	0.561545	12.5674	0.520461	16.7025	1.13366	1.13367
1.9	263.722	0.271162	2.87518	0.126725	0.156965	0.0922448	1.26101	0.0897296	0.79335	0.0036573	1.327	0.26	0.027	0.12	0.011	0.087	0.0339	0.086	0.004508	0.00088	0.0153255	1.69338	0.141738	-0.0299158	3.98458e-06	9.413	0.570557	10.2599	0.426788	19.0777	1.15036	1.15037
2	396.7	0.27088	4.02475	0.136273	0.364866	0.0936342	1.76997	0.0906168	1.21491	0.0053717	1.327	0.26	0.027	0.12	0.011	0.087	0.0339	0.086	0.004508	0.00088	0.0214531	1.69854	0.104257	0.0604638	2.93089e-06	8.51384	0.496588	8.63568	0.410071	17.2639	1.00222	1.00222
2.5	1136.76	0.286356	11.8339	0.137713	0.696006	0.0922448	5.59731	0.0909344	3.44835	0.0131487	1.327	0.26	0.027	0.12	0.011	0.087	0.0339	0.086	0.004508	0.00088	0.0630782	1.82748	0.0365203	-0.0261254	1.02667e-06	9.13767	0.349311	9.50982	0.346271	18.5225	0.704497	0.704504
3	2045.04	0.305287	30.6115	0.12675	1.69298	0.0929211	13.3914	0.0903274	5.92425	0.0220139	1.327	0.26	0.027	0.12	0.011	0.087	0.0339	0.086	0.004508	0.00088	0.163168	1.69139	0.0133868	0.0172085	3.76333e-07	9.09741	0.218272	13.6143	0.321744	18.4413	0.440235	0.440247
3.5	2349.86	0.305287	51.7159	0.128129	1.90267	0.0932731	22.7313	0.0913026	6.33788	0.0234486	1.327	0.26	0.027	0.12	0.011	0.087	0.0339	0.086	0.004508	0.00088	0.275661	1.70002	0.0080228	0.0023413	2.2554e-07	8.92046	0.137328	19.6274	0.298226	18.0843	0.277033	0.277051
4	785.859	0.278568	47.3602	0.138751	0.939909	0.0922448	21.9586	0.0912995	1.34014	0.005529	1.327	0.26	0.027	0.12	0.011	0.087	0.0339	0.086	0.004508	0.00088	0.252444	1.79389	0.0091243	0.0047593	2.56504e-07	8.22053	0.0427958	49.5281	0.213786	16.6718	0.0863988	0.0864471
5	616.642	0.276812	42.3802	0.134481	0.78512	0.0922448	46.4446	0.0914497	0.950584	0.004392	1.327	0.26	0.027	0.12	0.011	0.087	0.0339	0.086	0.004508	0.00088	0.225899	4.24159	0.01584	0.0042799	4.45299e-07	8.03472	0.0407033	55.1669	0.218957	16.2966	0.0821912	0.0822398
6	353.854	0.270601	26.7582	0.125524	0.343206	0.0925782	35.8278	0.0907326	0.48969	0.0026868	1.327	0.26	0.027	0.12	0.011	0.087	0.0339	0.086	0.004508	0.00088	0.142629	5.18407	0.0276361	-0.0099325	7.76912e-07	7.98201	0.0491387	60.2844	0.244012	16.1902	0.0992303	0.0992701
8	464.698	0.273542	35.5358	0.126443	0.481972	0.0919208	85.613	0.0952224	0.656294	0.0032952	1.327	0.26	0.027	0.12	0.011	0.087	0.0339	0.086	0.004508	0.00088	0.189416	9.33432	0.0347982	-0.0076497	9.78257e-07	7.96368	0.0406433	60.7507	0.223849	16.1532	0.0820763	0.0821241
10	155.813	0.268246	11.8215	0.135808	0.285247	0.0919208	29.8476	0.0913362	0.219279	0.0017037	1.327	0.26	0.027	0.12	0.011	0.087	0.0339	0.086	0.004508	0.00088	0.0630121	9.7858	0.116341	0.0229678	3.27062e-06	8.0631	0.105003	61.0181	0.384587	16.354	0.212023	0.212042
12	167.776	0.268494	14.1742	0.124942	0.350228	0.0922448	34.8198	0.0920417	0.207574	0.0016847	1.327	0.26	0.027	0.12	0.011	0.087	0.0339	0.086	0.004508	0.00088	0.0755527	9.52443	0.0876492	0.0267678	2.46401e-06	7.87343	0.0805344	66.3516	0.357094	15.9709	0.16265	0.162674
CAT15-KS24 (lat=39.101381, long=36.044444), whole rock, J =0.0011132 ± 0.0000002
1.1	2.5486	0.265347	0.0014902	0.125217	0.0024727	0.0919208	0.105355	0.0906165	0.0075319	0.0009468	1.327	0.26	0.027	0.12	0.011	0.087	0.0339	0.086	0.004508	0.00088	7.94344e-06	274.197	23040.4	2.0253	0.647716	230.491	21018.2	12.4228	15.278	418.002	34077.4	34077.4			16.7	1.1
1.2	19.5111	0.265754	-0.0566293	0.13227	0.118589	0.0925782	0.0615392	0.0906165	0.061717	0.0011386	1.327	0.26	0.027	0.12	0.011	0.087	0.0339	0.086	0.004508	0.00088	-0.000301851	-4.21624	11.6416	-5.51328	0.0003273	-19.3411	45.7578	5.62172	2.21412	-39.8347	95.2754	95.2754
1.3	34.2872	0.265754	0.0861361	0.13399	-0.0519259	0.0919208	0.0240249	0.090311	0.106808	0.0012766	1.327	0.26	0.027	0.12	0.011	0.087	0.0339	0.086	0.004508	0.00088	0.000459131	1.08291	4.4055	-2.46323	0.0001238	27.8744	43.7089	7.00212	1.3569	55.9262	86.3696	86.3696
1.4	34.6994	0.264955	0.270231	0.125504	0.0014836	0.0936342	0.166993	0.0906165	0.104878	0.0013016	1.327	0.26	0.027	0.12	0.011	0.087	0.0339	0.086	0.004508	0.00088	0.00144041	2.4001	1.71427	-0.233581	4.82e-05	12.6357	6.12559	9.83604	1.3582	25.5638	12.3068	12.3068
1.5	40.8257	0.265347	-0.0048681	0.1261	-0.023342	0.0916063	0.170538	0.0900153	0.128274	0.0013839	1.327	0.26	0.027	0.12	0.011	0.087	0.0339	0.086	0.004508	0.00088	-2.59486e-05	-136.106	3526.31	28.2654	0.0991325	-504.898	12588.5	6.25656	1.20402	-1511.08	58561.7	58561.7
1.6	46.1484	0.262481	-0.0035766	0.131855	0.0970273	0.0913014	0.179498	0.0909315	0.13804	0.0014388	1.327	0.26	0.027	0.12	0.011	0.087	0.0339	0.086	0.004508	0.00088	-1.90643e-05	-195.056	7191.67	-57.5981	0.202174	-1314.52	45899.1	10.7592	1.09304	N/A	-201828	-201828
1.7	54.1969	0.262909	0.451742	0.125504	0.0643882	0.0922448	0.0868442	0.0909315	0.163846	0.0014735	1.327	0.26	0.027	0.12	0.011	0.087	0.0339	0.086	0.004508	0.00088	0.00240792	0.747431	0.809689	0.17755	2.28e-05	11.7173	3.44824	9.76687	0.947211	23.7176	6.93476	6.93476
1.8	56.0649	0.265754	0.429588	0.124398	0.0644871	0.0922448	0.319512	0.090311	0.167911	0.0015515	1.327	0.26	0.027	0.12	0.011	0.087	0.0339	0.086	0.004508	0.00088	0.00228983	2.89372	1.17096	0.18425	3.29e-05	13.9393	4.2272	10.6745	0.954211	28.1809	8.48064	8.48064
1.9	76.225	0.264955	0.843577	0.125217	0.175262	0.0916063	0.389716	0.0906165	0.230281	0.0017961	1.327	0.26	0.027	0.12	0.011	0.087	0.0339	0.086	0.004508	0.00088	0.00449652	1.79803	0.496003	0.415787	1.39e-05	8.93677	1.50498	9.88759	0.785676	18.1172	3.03594	3.03594
2	130.754	0.267524	1.96255	0.13399	0.264476	0.0916063	0.904184	0.0909316	0.390146	0.002396	1.327	0.26	0.027	0.12	0.011	0.087	0.0339	0.086	0.004508	0.00088	0.010461	1.79374	0.218035	0.244704	6.12944e-06	7.34921	0.635313	11.0278	0.584649	14.9119	1.28384	1.28384
2.5	646.526	0.278568	6.46925	0.125505	0.914688	0.0916063	3.36142	0.0906175	2.0058	0.0079362	1.327	0.26	0.027	0.12	0.011	0.087	0.0339	0.086	0.004508	0.00088	0.034483	2.0237	0.0672132	0.203099	1.88951e-06	7.45604	0.396296	7.45814	0.369036	15.1278	0.800741	0.800745
3	824.789	0.27821	8.36504	0.125219	1.26175	0.0925783	4.48252	0.091592	2.52338	0.0099354	1.327	0.26	0.027	0.12	0.011	0.087	0.0339	0.086	0.004508	0.00088	0.0445882	2.08776	0.0528824	0.235079	1.48664e-06	8.62646	0.379008	8.7459	0.361246	17.4912	0.764822	0.764827
3.5	758.071	0.278568	10.524	0.126412	1.36283	0.0922448	4.92294	0.0912583	2.24764	0.0089248	1.327	0.26	0.027	0.12	0.011	0.087	0.0339	0.086	0.004508	0.00088	0.0560961	1.82378	0.0402851	0.221364	1.13251e-06	8.3467	0.273698	11.5842	0.35345	16.9265	0.552481	0.552489
4	780.405	0.282312	11.6682	0.137713	1.48152	0.0919208	4.93535	0.0906187	2.27121	0.0089998	1.327	0.26	0.027	0.12	0.011	0.087	0.0339	0.086	0.004508	0.00088	0.0621951	1.64966	0.0360075	0.224375	1.01225e-06	8.83942	0.254044	13.2132	0.346245	17.9208	0.51253	0.51254
5	1064.88	0.290689	15.9215	0.125805	1.54314	0.0916063	7.43374	0.0909365	3.05768	0.0117501	1.327	0.26	0.027	0.12	0.011	0.087	0.0339	0.086	0.004508	0.00088	0.0848663	1.82161	0.0265281	0.138686	7.45764e-07	9.62383	0.233883	14.385	0.330597	19.5027	0.471448	0.47146
6	1254.76	0.286356	24.3368	0.128424	1.73561	0.0929211	11.371	0.0916018	3.48917	0.0133201	1.327	0.26	0.027	0.12	0.011	0.087	0.0339	0.086	0.004508	0.00088	0.129722	1.82355	0.0175612	0.0910657	4.93685e-07	8.83124	0.170387	17.1239	0.317793	17.9043	0.343755	0.343769
8	1995.1	0.305287	58.4088	0.13878	2.80558	0.0929212	21.7402	0.0909742	4.99725	0.0190378	1.327	0.26	0.027	0.12	0.011	0.087	0.0339	0.086	0.004508	0.00088	0.311337	1.45318	0.0069929	0.0551536	1.96585e-07	8.67496	0.0996308	25.3926	0.28534	17.589	0.20104	0.201063
10	1851.76	0.305287	103.669	0.138961	3.256	0.0916065	43.4409	0.091759	3.35753	0.0127759	1.327	0.26	0.027	0.12	0.011	0.087	0.0339	0.086	0.004508	0.00088	0.552591	1.63941	0.0041013	0.0360345	1.15296e-07	8.26181	0.0385529	46.2429	0.206811	16.7551	0.0778295	0.0778837
12	3222.13	0.316228	281.124	0.15204	6.29699	0.0936351	239.387	0.108742	3.45008	0.0132285	1.327	0.26	0.027	0.12	0.011	0.087	0.0339	0.086	0.004508	0.00088	1.49848	3.33268	0.0023538	0.021013	6.61713e-08	7.93949	0.0148072	69.2214	0.123514	16.1043	0.0299029	0.0300331
M12SAR37 (lat=39.21805, long=36.802633), whole rock, J =0.0011305 ± 0.0000002
1.1	14.9811	0.264764	0.270032	0.135805	0.040255	0.0925782	0.243499	0.0909315	0.045305	0.0010806	1.327	0.26	0.027	0.12	0.011	0.087	0.0339	0.086	0.004508	0.00088	0.00143939	3.81612	2.39044	0.303272	6.72e-05	5.55062	3.19483	9.99673	2.79348	11.4483	6.56887	6.56887			16.74	0.04
1.2	45.016	0.266391	0.950577	0.126409	0.0365954	0.0922448	0.98837	0.0894536	0.131254	0.0013946	1.327	0.26	0.027	0.12	0.011	0.087	0.0339	0.086	0.004508	0.00088	0.00506701	4.40175	0.708058	-0.0010446	1.99e-05	6.31796	0.989435	13.3281	1.10146	13.0254	2.03262	2.03262
1.3	57.8365	0.265347	1.35463	0.126725	0.280598	0.092921	1.20607	0.0909317	0.157093	0.0015367	1.327	0.26	0.027	0.12	0.011	0.087	0.0339	0.086	0.004508	0.00088	0.00722081	3.77703	0.453808	0.499943	1.28e-05	8.23711	0.865221	19.2772	0.921071	16.9637	1.77362	1.77363
1.4	72.0745	0.26661	2.10293	0.126725	-0.0070224	0.093273	1.9856	0.0909319	0.185877	0.0015777	1.327	0.26	0.027	0.12	0.011	0.087	0.0339	0.086	0.004508	0.00088	0.0112096	4.00698	0.303279	-0.095194	8.52587e-06	8.05379	0.55003	23.4782	0.75631	16.5879	1.12774	1.12774
1.5	98.3835	0.268002	3.33556	0.125799	0.137876	0.0943834	3.4009	0.0912572	0.235584	0.001881	1.327	0.26	0.027	0.12	0.011	0.087	0.0339	0.086	0.004508	0.00088	0.0177801	4.3284	0.200345	0.0440586	5.63213e-06	8.59417	0.374467	29.1093	0.637682	17.6955	0.767316	0.76732
1.6	92.7776	0.266833	3.54092	0.127378	-0.0474752	0.0925782	3.15337	0.0900163	0.209257	0.0016874	1.327	0.26	0.027	0.12	0.011	0.087	0.0339	0.086	0.004508	0.00088	0.0188747	3.78192	0.173678	-0.10838	4.88248e-06	8.71836	0.352945	33.2473	0.622117	17.95	0.723114	0.723119
1.7	125.223	0.266175	4.97841	0.127715	0.0174076	0.092921	5.10313	0.0909339	0.265992	0.001787	1.327	0.26	0.027	0.12	0.011	0.087	0.0339	0.086	0.004508	0.00088	0.0265372	4.35463	0.136018	-0.0562384	3.82377e-06	9.388	0.269329	37.287	0.482894	19.3214	0.551389	0.551395
1.8	130.082	0.26706	6.00528	0.134436	0.136293	0.0913014	6.08136	0.0919369	0.248911	0.0019029	1.327	0.26	0.027	0.12	0.011	0.087	0.0339	0.086	0.004508	0.00088	0.032011	4.305	0.11629	0.0059721	3.26918e-06	9.47138	0.236709	43.6831	0.491067	19.4921	0.484562	0.484569
1.9	126.945	0.266391	6.75468	0.125505	0.115523	0.0910063	6.94803	0.0912605	0.223314	0.0018617	1.327	0.26	0.027	0.12	0.011	0.087	0.0339	0.086	0.004508	0.00088	0.0360056	4.37436	0.0995352	-0.0056524	2.79816e-06	9.11065	0.192569	48.4299	0.49629	18.7535	0.394363	0.394372
2	141.799	0.266833	8.74823	0.12738	0.151624	0.0916063	8.88696	0.0906236	0.228079	0.0017925	1.327	0.26	0.027	0.12	0.011	0.087	0.0339	0.086	0.004508	0.00088	0.0466322	4.32157	0.0768217	-0.0011689	2.15963e-06	8.60985	0.142986	53.0671	0.433617	17.7276	0.292986	0.292996
2.5	373.159	0.272325	26.2568	0.127396	0.443893	0.0916063	29.3243	0.0906943	0.515757	0.0028882	1.327	0.26	0.027	0.12	0.011	0.087	0.0339	0.086	0.004508	0.00088	0.139961	4.75276	0.0273466	0.0011357	7.68774e-07	8.55087	0.0540299	60.1016	0.246548	17.6068	0.110717	0.110743
3	579.76	0.275136	47.4318	0.136329	0.777208	0.092921	48.3631	0.0928546	0.634667	0.0033792	1.327	0.26	0.027	0.12	0.011	0.087	0.0339	0.086	0.004508	0.00088	0.252834	4.34066	0.0150035	0.0030286	4.21781e-07	8.41366	0.0328139	68.7679	0.183686	17.3256	0.0672523	0.0672938
3.5	775.322	0.278568	71.6715	0.138328	0.845948	0.0925782	67.103	0.0945749	0.647134	0.0032721	1.327	0.26	0.027	0.12	0.011	0.087	0.0339	0.086	0.004508	0.00088	0.382043	3.98848	0.0095319	-0.0078986	2.67963e-07	8.29208	0.0214659	76.5864	0.134432	17.0764	0.0440004	0.0440621
4	1109.26	0.290689	116.257	0.142105	1.61722	0.0919208	86.0592	0.0944316	0.609641	0.0037773	1.327	0.26	0.027	0.12	0.011	0.087	0.0339	0.086	0.004508	0.00088	0.619705	3.15458	0.0051817	0.0002338	1.4567e-07	8.10982	0.0141646	84.9425	0.107865	16.7027	0.0290402	0.0291296
5	836.753	0.282312	91.2969	0.143587	1.22733	0.0910063	68.0929	0.092346	0.390564	0.0022538	1.327	0.26	0.027	0.12	0.011	0.087	0.0339	0.086	0.004508	0.00088	0.486656	3.17952	0.006603	-0.0005918	1.85624e-07	8.02297	0.0150073	87.482	0.0927679	16.5247	0.0307709	0.0308535
6	300.844	0.271162	32.6315	0.126129	0.414221	0.092921	20.1342	0.0923222	0.150918	0.0018488	1.327	0.26	0.027	0.12	0.011	0.087	0.0339	0.086	0.004508	0.00088	0.173941	2.63126	0.0157801	-0.0029857	4.43613e-07	7.94993	0.036093	86.1889	0.218946	16.3749	0.0740111	0.0740448
8	327.744	0.26952	34.9796	0.136303	0.49295	0.0922448	27.8559	0.0923551	0.192474	0.0016614	1.327	0.26	0.027	0.12	0.011	0.087	0.0339	0.086	0.004508	0.00088	0.186458	3.3972	0.017381	0.0006334	4.88619e-07	7.87106	0.0347216	83.9482	0.186005	16.2132	0.0712052	0.0712396
10	603.399	0.278568	60.7245	0.138787	1.03892	0.0919208	82.7017	0.0943824	0.47046	0.0027146	1.327	0.26	0.027	0.12	0.011	0.087	0.0339	0.086	0.004508	0.00088	0.323691	5.81393	0.0148523	0.0082891	4.17532e-07	7.87216	0.0230267	79.1135	0.147889	16.2154	0.0472219	0.0472738
12	892.114	0.286356	74.3551	0.135483	1.22268	0.0919208	148.261	0.101379	1.12186	0.0051095	1.327	0.26	0.027	0.12	0.011	0.087	0.0339	0.086	0.004508	0.00088	0.396348	8.51506	0.0165718	0.002503	4.65872e-07	7.85834	0.0256081	65.3555	0.176752	16.1871	0.0525166	0.0525631
M12SAR40 (lat=39.193725, long=36.886200), whole rock, J = 0.0000598 ± 0.0000003
0.3	-0.4926	0.547449	-0.0682515	0.248796	-0.247016	0.155915	0.244897	0.156413	-0.0016429	0.0028558	1.234	0.54	0.023	0.24	-0.001	0.15	-0.032	0.15	0.00705	0.0028	-0.00020807	-14.4999	53.6615	10.4418	0.0015562	-0.420493	14.8526	-5.85598	205.855	-0.0460393	1.62621	1.62621	16.6	0.5
0.7	-0.6471	0.546805	0.177037	0.250718	-0.0004946	0.155387	-0.0785128	0.154365	-0.0022598	0.0028578	1.234	0.54	0.023	0.24	-0.001	0.15	-0.032	0.15	0.00705	0.0028	0.000539711	-1.79256	4.34347	-0.0386222	0.000126	0.089596	5.7223	-2.45331	156.663	0.0098096	0.626518	0.626518
0.9	174.787	0.553173	0.48392	0.247778	0.27244	0.157041	-0.110036	0.155342	0.521555	0.0043512	1.234	0.54	0.023	0.24	-0.001	0.15	-0.032	0.15	0.00705	0.0028	0.00147527	-0.919304	1.38054	1.00546	4e-05	39.362	20.3582	10.904	0.808677	4.30458	2.22374	2.22383
1.1	286.456	0.557853	0.742918	0.247292	-0.0119699	0.156466	1.36171	0.154601	0.516179	0.0041381	1.234	0.54	0.023	0.24	-0.001	0.15	-0.032	0.15	0.00705	0.0028	0.00226485	7.4121	2.6068	-0.463676	7.56e-05	178.811	59.6969	46.2707	0.481797	19.4736	6.46689	6.46753
1.3	509.302	0.566127	2.83388	0.249873	0.0582669	0.155387	4.46961	0.156137	0.227533	0.0036041	1.234	0.54	0.023	0.24	-0.001	0.15	-0.032	0.15	0.00705	0.0028	0.00863931	6.37952	0.605042	-0.0213785	1.75e-05	156.277	13.8158	86.792	0.257549	17.0309	1.49865	1.50077
1.5	793.05	0.590932	4.9599	0.24828	0.0683573	0.155648	6.514	0.155343	0.171404	0.0034109	1.234	0.54	0.023	0.24	-0.001	0.15	-0.032	0.15	0.00705	0.0028	0.0151207	5.31341	0.294617	-0.0160794	8.54389e-06	149.999	7.52576	93.6691	0.164097	16.3498	0.816649	0.820242
1.7	889.702	0.595063	5.25973	0.24906	-0.0585637	0.156466	7.73503	0.154601	0.243962	0.0036098	1.234	0.54	0.023	0.24	-0.001	0.15	-0.032	0.15	0.00705	0.0028	0.0160348	5.95113	0.305874	-0.0947528	8.87035e-06	155.795	7.39574	91.942	0.151466	16.9786	0.802264	0.806206
1.9	835.229	0.590932	5.08498	0.246364	0.0909122	0.156466	6.24871	0.156137	0.234915	0.0036689	1.234	0.54	0.023	0.24	-0.001	0.15	-0.032	0.15	0.00705	0.0028	0.015502	4.97396	0.271147	-0.0105843	7.86326e-06	150.857	7.3253	91.7139	0.162569	16.4429	0.794856	0.798589
2.5	1313.15	0.622656	7.74728	0.248797	0.22733	0.156466	8.0416	0.155602	0.274293	0.0036212	1.234	0.54	0.023	0.24	-0.001	0.15	-0.032	0.15	0.00705	0.0028	0.0236183	4.20238	0.15756	0.0285174	4.56923e-06	159.266	5.12445	93.8548	0.104947	17.3551	0.555769	0.561696
3	1118.31	0.595063	6.89797	0.248536	0.257304	0.155132	4.72653	0.155343	0.232076	0.0036679	1.234	0.54	0.023	0.24	-0.001	0.15	-0.032	0.15	0.00705	0.0028	0.0210291	2.77475	0.135321	0.0524811	3.9243e-06	152.282	5.49489	93.8672	0.122153	16.5975	0.596191	0.601252
4	1363.81	0.632851	7.70546	0.248028	0.242861	0.155387	7.05718	0.154136	0.637543	0.0045012	1.234	0.54	0.023	0.24	-0.001	0.15	-0.032	0.15	0.00705	0.0028	0.0234908	3.70968	0.144303	0.0089149	4.18479e-06	152.577	4.92119	86.1202	0.116041	16.6295	0.533935	0.539602
5	1064.09	0.590932	5.73849	0.248536	0.318143	0.156751	10.9535	0.154602	0.833672	0.0050962	1.234	0.54	0.023	0.24	-0.001	0.15	-0.032	0.15	0.00705	0.0028	0.0174943	7.73319	0.352264	0.0442799	1.02e-05	142.675	6.20198	76.7623	0.159252	15.5548	0.673293	0.677236
6	774.516	0.572451	3.56269	0.249327	0.113368	0.157945	12.6753	0.156139	0.764003	0.0050397	1.234	0.54	0.023	0.24	-0.001	0.15	-0.032	0.15	0.00705	0.0028	0.0108612	14.4174	1.02448	-0.0616821	2.97e-05	154.61	10.8823	70.7926	0.214417	16.8501	1.18055	1.18319
7	552.482	0.563205	2.42109	0.24828	0.183506	0.156751	12.737	0.155091	0.623842	0.0045635	1.234	0.54	0.023	0.24	-0.001	0.15	-0.032	0.15	0.00705	0.0028	0.0073809	21.3237	2.20208	0.0425262	6.39e-05	153.107	15.8262	66.631	0.275474	16.687	1.71704	1.71883
M12KNG07 (lat=38.882733, long=36.817250), whole rock, J = 0.0000618 ± 0.0000006
0.1	-0.5064	0.546342	-0.057522	0.249327	0.0508475	0.155915	0.0640317	0.154601	-0.0027021	0.0028519	1.234	0.54	0.023	0.24	-0.001	0.15	-0.032	0.15	0.00705	0.0028	-0.000175352	-3.88682	19.2847	-2.6263	0.0005593	-5.37183	29.1409	-61.1109	210.415	-0.60745	3.29582	3.29582	5.4	0.18
0.3	-0.7688	0.54619	-0.371459	0.249327	-0.0657852	0.156188	0.0468909	0.153482	-0.0008124	0.0028772	1.234	0.54	0.023	0.24	-0.001	0.15	-0.032	0.15	0.00705	0.0028	-0.00113236	-0.440871	1.47308	0.47486	4.27e-05	1.40287	2.89732	67.8061	140.925	0.158605	0.327548	0.327551
0.5	-0.4076	0.546342	0.00457	0.249598	-0.423894	0.155915	-0.130231	0.155602	-0.0012939	0.00285	1.234	0.54	0.023	0.24	-0.001	0.15	-0.032	0.15	0.00705	0.0028	1.39312e-05	-99.5485	5438.34	-268.829	0.157712	-9.62056	551.665	11.1496	248.589	-1.08804	62.4094	62.4094
0.7	0.589	0.546649	0.110673	0.250433	-0.0922972	0.154639	-0.0350697	0.156413	0.000674	0.0028558	1.234	0.54	0.023	0.24	-0.001	0.15	-0.032	0.15	0.00705	0.0028	0.000337377	-1.1072	5.53742	-2.45883	0.0001606	3.44615	12.0193	64.7903	182.201	0.389587	1.35863	1.35864
0.9	79.4674	0.54812	0.580882	0.248796	0.207842	0.156188	0.429111	0.155602	0.203782	0.003536	1.234	0.54	0.023	0.24	-0.001	0.15	-0.032	0.15	0.00705	0.0028	0.00177078	2.58178	1.44887	0.808308	4.2e-05	32.1867	13.9492	23.5119	1.50585	3.63547	1.574	1.57433
1.1	146.697	0.549181	1.68145	0.24682	0.128603	0.157638	1.51302	0.155866	0.249709	0.0035515	1.234	0.54	0.023	0.24	-0.001	0.15	-0.032	0.15	0.00705	0.0028	0.00512578	3.14557	0.5641	0.103297	1.64e-05	43.0588	6.36715	49.312	0.834786	4.86184	0.717972	0.71929
1.3	244.854	0.555428	3.12109	0.247778	0.0574755	0.156466	3.10396	0.156983	0.24331	0.0036717	1.234	0.54	0.023	0.24	-0.001	0.15	-0.032	0.15	0.00705	0.0028	0.00951441	3.47736	0.327322	-0.0264702	9.49233e-06	55.3575	4.41753	70.4948	0.526834	6.24815	0.497752	0.500883
1.5	294.884	0.555428	5.11419	0.24828	0.0322496	0.155648	3.35753	0.154601	0.177142	0.0034695	1.234	0.54	0.023	0.24	-0.001	0.15	-0.032	0.15	0.00705	0.0028	0.0155902	2.29606	0.153631	-0.0379514	4.4553e-06	47.4296	2.31582	82.2108	0.427673	5.35463	0.261066	0.265429
1.7	274.413	0.557853	4.69087	0.247533	0.0034624	0.156466	2.99885	0.155866	0.118526	0.0033989	1.234	0.54	0.023	0.24	-0.001	0.15	-0.032	0.15	0.00705	0.0028	0.0142998	2.23636	0.165642	-0.0489739	4.80362e-06	51.0652	2.708	87.2443	0.457815	5.76444	0.305209	0.309539
1.9	342.265	0.557853	6.22996	0.24906	-0.0214668	0.156751	3.27488	0.156137	0.11991	0.0031915	1.234	0.54	0.023	0.24	-0.001	0.15	-0.032	0.15	0.00705	0.0028	0.0189916	1.83929	0.114441	-0.0578329	3.31879e-06	49.2796	1.97928	89.6625	0.354218	5.56318	0.223102	0.228591
2.5	594.771	0.56921	11.0457	0.2496	0.0917036	0.155648	4.87981	0.155602	0.258536	0.0035548	1.234	0.54	0.023	0.24	-0.001	0.15	-0.032	0.15	0.00705	0.0028	0.0336721	1.54615	0.0604264	-0.0260596	1.75237e-06	46.9296	1.06662	87.1273	0.219018	5.29827	0.120245	0.12926
3	417.192	0.557853	6.73315	0.247292	0.189739	0.157041	3.47742	0.155089	0.322829	0.0037669	1.234	0.54	0.023	0.24	-0.001	0.15	-0.032	0.15	0.00705	0.0028	0.0205255	1.80793	0.104454	0.0181677	3.02916e-06	47.7317	1.76404	77.0043	0.318093	5.3887	0.198859	0.204626
4	297.051	0.553173	4.54334	0.248536	0.091209	0.155648	6.3748	0.156414	0.292568	0.0038857	1.234	0.54	0.023	0.24	-0.001	0.15	-0.032	0.15	0.00705	0.0028	0.01385	4.91287	0.294547	-0.0141677	8.54185e-06	46.4032	2.55837	70.8704	0.452436	5.23893	0.288427	0.292215
5	130.293	0.548467	1.98148	0.245708	0.033041	0.156751	2.32544	0.155343	0.119388	0.0031454	1.234	0.54	0.023	0.24	-0.001	0.15	-0.032	0.15	0.00705	0.0028	0.00604039	4.11018	0.578923	-0.0218022	1.68e-05	47.9739	5.98245	72.8721	0.889404	5.416	0.674388	0.676128
6	135.971	0.548467	1.72516	0.248027	0.193992	0.156188	2.57831	0.156137	0.127854	0.0032416	1.234	0.54	0.023	0.24	-0.001	0.15	-0.032	0.15	0.00705	0.0028	0.00525904	5.23542	0.816744	0.248366	2.37e-05	56.9719	8.23072	72.1722	0.868539	6.43004	0.927317	0.929101
CAT15-KS8 (lat=38.338128, long=37.625289), whole rock, J =0.0011077 ± 0.0000001
1.1	10.7899	0.21704	0.481647	0.1261	0.145591	0.0922448	0.191805	0.0909315	0.0227278	0.0008248	1.81148	0.209147	0.027	0.12	0.011	0.087	0.0339	0.086	0.0055653	0.0006237	0.00256726	1.44068	0.780233	0.813289	2.19e-05	8.3795	2.29841	37.3976	3.13628	16.9092	4.61665	4.61665			16.18	0.03
1.2	63.494	0.217041	3.01079	0.126101	0.161514	0.0922448	1.05582	0.0900154	0.132446	0.0012678	1.80036	0.209147	0.027	0.12	0.011	0.087	0.0339	0.086	0.0055385	0.0006237	0.016048	1.26911	0.120551	0.0941458	3.38896e-06	8.00869	0.365554	37.9704	0.699658	16.1642	0.734561	0.734563
1.3	69.8281	0.218717	3.94557	0.127378	0.058256	0.0919208	1.76603	0.0900156	0.131881	0.0012354	1.78945	0.209144	0.027	0.12	0.011	0.087	0.0339	0.086	0.0055124	0.0006237	0.0210305	1.62043	0.0977675	-0.0127861	2.74846e-06	7.78649	0.274015	43.986	0.629664	15.7176	0.550751	0.550755
1.4	151.275	0.220225	9.12824	0.127716	0.164976	0.0916063	4.75319	0.0906185	0.267824	0.0016088	1.77863	0.209136	0.027	0.12	0.011	0.087	0.0339	0.086	0.0054867	0.0006237	0.048655	1.88578	0.0445947	-0.0009451	1.25366e-06	7.89203	0.12475	47.6067	0.356235	15.9298	0.25071	0.250717
1.5	192.418	0.220199	11.7499	0.127052	0.316105	0.093273	6.26755	0.0909351	0.336118	0.002126	1.75726	0.209109	0.027	0.12	0.011	0.087	0.0339	0.086	0.0054367	0.0006236	0.0626288	1.93311	0.0349797	0.0250599	9.83357e-07	7.91733	0.103012	48.3305	0.353612	15.9806	0.207018	0.207028
1.6	376.346	0.223516	24.1007	0.126741	0.547448	0.092921	14.1352	0.0909496	0.626599	0.0033044	1.74663	0.20909	0.027	0.12	0.011	0.087	0.0339	0.086	0.0054122	0.0006235	0.128461	2.12626	0.017669	0.0143542	4.96716e-07	7.94332	0.0592568	50.8481	0.270541	16.0328	0.119082	0.119098
1.7	472.901	0.228413	31.4447	0.126752	0.558921	0.0922448	19.4007	0.0906506	0.746469	0.0035411	1.73608	0.209066	0.027	0.12	0.011	0.087	0.0339	0.086	0.0053881	0.0006234	0.167606	2.23751	0.0138077	0.0012726	3.88164e-07	8.0464	0.0473149	53.4806	0.230248	16.24	0.0950727	0.0950941
1.8	469.223	0.223824	32.2391	0.126753	0.690961	0.0919208	20.9856	0.0912958	0.701079	0.0033554	1.72554	0.209039	0.027	0.12	0.011	0.087	0.0339	0.086	0.0053643	0.0006234	0.17184	2.36149	0.0138472	0.0129745	3.89277e-07	8.16221	0.0452454	56.0549	0.220474	16.4726	0.0909027	0.0909257
1.9	455.111	0.225631	33.2993	0.1363	0.572669	0.0922448	22.3706	0.0923307	0.628201	0.0030987	1.71516	0.209008	0.027	0.12	0.011	0.087	0.0339	0.086	0.0053411	0.0006233	0.177491	2.43804	0.0141719	0.0022761	3.98405e-07	8.13841	0.0439445	59.5181	0.211412	16.4248	0.0882915	0.088315
2	414.156	0.224088	32.0523	0.127076	0.478708	0.0916063	22.1593	0.0923298	0.524624	0.0027007	1.69472	0.208936	0.027	0.12	0.011	0.087	0.0339	0.086	0.0052961	0.0006231	0.170844	2.51072	0.0144403	-0.0029136	4.05948e-07	8.14116	0.0415575	62.9744	0.205044	16.4304	0.0834952	0.0835202
2.5	951.668	0.236087	87.0579	0.137899	1.31051	0.0919208	72.9684	0.0942508	0.839655	0.0038572	1.68452	0.208895	0.027	0.12	0.011	0.087	0.0339	0.086	0.005274	0.0006229	0.464034	3.04493	0.0062235	0.0011359	1.74956e-07	8.18166	0.0187735	74.7964	0.125246	16.5117	0.0377171	0.0377728
3	1104.37	0.24087	113.802	0.138521	1.56935	0.0916063	86.098	0.0936693	0.643178	0.0032044	1.67438	0.208851	0.027	0.12	0.011	0.087	0.0339	0.086	0.0052523	0.0006228	0.606585	2.74945	0.0044886	-0.0003599	1.26185e-07	8.13386	0.0132182	83.7697	0.0916494	16.4157	0.0265576	0.0266357
3.5	896.389	0.236006	98.5502	0.142013	1.34503	0.0925783	71.9391	0.0934735	0.384412	0.0022275	1.66437	0.208804	0.027	0.12	0.011	0.087	0.0339	0.086	0.0052311	0.0006227	0.525289	2.65376	0.0051491	0.0001804	1.44754e-07	8.04396	0.0136789	88.3886	0.0826459	16.235	0.0274859	0.0275597
4	605.233	0.23147	67.3168	0.139814	0.840112	0.0925782	55.5205	0.0918657	0.261295	0.0018221	1.65443	0.208754	0.027	0.12	0.011	0.087	0.0339	0.086	0.0052104	0.0006225	0.35881	2.99941	0.0079648	-0.0031763	2.2391e-07	7.95956	0.0187766	88.4734	0.103963	16.0655	0.0377325	0.0377852
5	490.761	0.225847	51.3875	0.136813	0.704413	0.0922448	66.8053	0.0949755	0.327107	0.0020287	1.59643	0.208417	0.027	0.12	0.011	0.087	0.0339	0.086	0.0050945	0.0006215	0.273904	4.73768	0.0142991	-0.0008747	4.01981e-07	7.85223	0.0245083	82.1272	0.138	15.8498	0.0492566	0.0492959
6	257.901	0.222478	24.2399	0.135357	0.471389	0.0925782	72.306	0.0934781	0.285209	0.0018669	1.58699	0.208357	0.027	0.12	0.011	0.087	0.0339	0.086	0.0050765	0.0006213	0.129203	10.8744	0.0623297	0.013164	1.75223e-06	7.59303	0.0494489	71.16	0.242982	15.3287	0.0994101	0.0994284
8	305.711	0.222774	28.3935	0.136766	0.481378	0.0925782	141.701	0.0997931	0.373005	0.0022783	1.57766	0.208296	0.027	0.12	0.011	0.087	0.0339	0.086	0.005059	0.0006212	0.151342	18.1998	0.0885973	0.0056069	2.49067e-06	7.62656	0.0453872	70.4797	0.245891	15.3962	0.0912412	0.0912612
10	155.194	0.212234	15.257	0.137231	0.42876	0.0913014	73.1599	0.0950522	0.163779	0.0013358	1.56838	0.208236	0.027	0.12	0.011	0.087	0.0339	0.086	0.0050419	0.000621	0.0813226	17.4932	0.158978	0.0392044	4.46922e-06	7.71908	0.0761978	75.5224	0.313978	15.5821	0.153164	0.153176
12	331.131	0.222309	13.4476	0.135809	0.306413	0.0922448	60.0093	0.0922541	0.785818	0.003646	1.55921	0.208176	0.027	0.12	0.011	0.087	0.0339	0.086	0.0050253	0.0006208	0.0716779	16.2851	0.166361	-0.0023651	4.67678e-06	7.87771	0.115421	31.8501	0.336914	15.901	0.231964	0.231973
CAT15-KS11 (lat=38.281086, long=37.583475), whole rock, J =0.0011077 ± 0.0000001
1.1	6.27055	0.214242	-0.0734193	0.1261	-0.0600363	0.0925782	0.0221541	0.090311	0.0185715	0.0007824	1.54475	0.208083	0.027	0.12	0.011	0.087	0.0339	0.086	0.0049996	0.0006205	-0.000391338	-1.1018	4.87383	2.47173	0.000137	-9.90975	17.554	11.6091	5.07481	-20.2008	35.9816	35.9816			16.38	0.1
1.2	25.2121	0.216785	0.569174	0.1382	0.134018	0.092921	0.533471	0.0915902	0.0694386	0.001035	1.53569	0.208026	0.027	0.12	0.011	0.087	0.0339	0.086	0.0049839	0.0006203	0.0030338	3.42354	1.01808	0.578767	2.86e-05	8.02174	2.05973	18.0957	1.5062	16.1904	4.13886	4.13886
1.3	24.5116	0.216733	1.11252	0.125799	0.0132535	0.0925782	0.98768	0.0922862	0.0504343	0.0009288	1.52675	0.207971	0.027	0.12	0.011	0.087	0.0339	0.086	0.0049687	0.0006202	0.00592992	3.24392	0.475836	-0.0274735	1.34e-05	8.63632	1.02757	39.1702	1.47812	17.4249	2.06341	2.06342
1.4	17.4772	0.215071	1.17014	0.125504	-0.0170119	0.0919208	1.21011	0.0909317	0.0229974	0.0007962	1.51787	0.207919	0.027	0.12	0.011	0.087	0.0339	0.086	0.0049539	0.00062	0.00623706	3.78006	0.495033	-0.0900931	1.39e-05	9.23007	1.02838	61.7442	1.98686	18.6168	2.0637	2.06371
1.5	25.9134	0.215023	2.08286	0.134886	0.0388703	0.0913014	2.15643	0.0915906	0.02545	0.0008163	1.5091	0.20787	0.027	0.12	0.011	0.087	0.0339	0.086	0.0049395	0.0006199	0.011102	3.78563	0.29318	0.0102336	8.24194e-06	8.95569	0.601294	71.9219	1.39003	18.0661	1.20701	1.20701
1.6	17.3389	0.215198	1.63162	0.135342	0.102566	0.092921	1.57846	0.0903113	0.0099217	0.0007381	1.49187	0.207784	0.027	0.12	0.011	0.087	0.0339	0.086	0.0049121	0.0006196	0.00869682	3.53979	0.356698	0.141728	1e-05	8.96398	0.767992	84.2856	2.06313	18.0828	1.54162	1.54162
1.7	26.2187	0.21322	2.6891	0.125217	0.0594428	0.0922448	2.40545	0.0903116	0.0128471	0.00075	1.48331	0.207747	0.027	0.12	0.011	0.087	0.0339	0.086	0.004899	0.0006195	0.0143334	3.27419	0.195847	0.0242566	5.50569e-06	8.46364	0.410965	86.7445	1.37525	17.0782	0.825398	0.8254
1.8	41.0607	0.216771	4.19275	0.125799	0.0690368	0.0922448	3.73804	0.0912574	0.017015	0.000787	1.47485	0.207715	0.027	0.12	0.011	0.087	0.0339	0.086	0.0048862	0.0006194	0.0223481	3.26446	0.126273	0.0082985	3.54982e-06	8.72129	0.272839	88.9907	0.910035	17.5956	0.547826	0.54783
1.9	33.0928	0.214595	3.67057	0.127048	-0.0287818	0.0919208	2.96639	0.0912569	0.0099403	0.0007379	1.46643	0.207689	0.027	0.12	0.011	0.087	0.0339	0.086	0.0048739	0.0006193	0.0195648	2.96014	0.137078	-0.0614561	3.85358e-06	8.33294	0.300635	92.3692	1.1065	16.8156	0.603895	0.603898
2	37.9409	0.213604	4.48494	0.125217	-0.0460905	0.0919208	3.16991	0.090312	0.0096507	0.0007378	1.45808	0.20767	0.027	0.12	0.011	0.087	0.0339	0.086	0.0048619	0.0006193	0.0239056	2.58976	0.103305	-0.0682346	2.90414e-06	7.92668	0.231841	93.6515	0.966128	15.9994	0.465913	0.465917
2.5	105.954	0.216426	11.6884	0.127051	0.295533	0.0922448	7.72116	0.0906219	0.03231	0.0008804	1.44175	0.207652	0.027	0.12	0.011	0.087	0.0339	0.086	0.0048395	0.0006192	0.0623012	2.42213	0.0387471	0.0345262	1.08927e-06	8.34276	0.0953291	91.99	0.372589	16.8354	0.191488	0.1915
3	202.159	0.218196	22.8568	0.126423	0.310072	0.0922448	13.8783	0.090949	0.0484429	0.0009562	1.43364	0.207655	0.027	0.12	0.011	0.087	0.0339	0.086	0.0048288	0.0006192	0.121831	2.22712	0.0190986	0.0008913	5.36905e-07	8.30629	0.0486022	93.8747	0.204865	16.7621	0.0976314	0.0976535
3.5	204.9	0.215085	24.2711	0.132706	0.273378	0.0925782	14.3001	0.0916085	0.0322651	0.0008875	1.42561	0.207667	0.027	0.12	0.011	0.087	0.0339	0.086	0.0048185	0.0006193	0.12937	2.16184	0.0182075	-0.0053559	5.11853e-07	8.13679	0.0467002	96.3447	0.195156	16.4216	0.0938281	0.0938503
4	176.763	0.21885	21.1739	0.126112	0.350426	0.0916063	13.1793	0.0912718	0.0271883	0.0008038	1.41763	0.207688	0.027	0.12	0.011	0.087	0.0339	0.086	0.0048086	0.0006193	0.112861	2.28464	0.0208685	0.0100032	5.86661e-07	8.06171	0.0504534	96.5269	0.21951	16.2707	0.101377	0.101397
5	247.203	0.217653	29.0866	0.126432	0.371098	0.0922448	22.4679	0.0906622	0.0531542	0.0009597	1.40975	0.20772	0.027	0.12	0.011	0.087	0.0339	0.086	0.0047991	0.0006194	0.155037	2.83626	0.0168219	-0.0012554	4.72901e-07	8.07391	0.0372637	94.9439	0.168294	16.2952	0.0748739	0.0749012
6	124.14	0.211262	14.8559	0.12551	-0.0427276	0.0936342	12.4035	0.0909455	0.0212145	0.0007766	1.39427	0.207817	0.027	0.12	0.011	0.087	0.0339	0.086	0.0047815	0.0006197	0.079185	3.06774	0.0343174	-0.0463541	9.64741e-07	8.06022	0.0713761	96.3944	0.301701	16.2677	0.143418	0.143432
8	87.762	0.211328	10.7478	0.127717	-0.0440134	0.0925782	10.2799	0.0915997	0.0168825	0.0007574	1.3866	0.207884	0.027	0.12	0.011	0.087	0.0339	0.086	0.0047732	0.0006199	0.057288	3.51557	0.052216	-0.0499407	1.46791e-06	7.84605	0.0977002	96.012	0.422217	15.8373	0.196358	0.196368
10	138.6	0.217885	17.0796	0.127722	0.260817	0.0919208	17.8521	0.0912848	0.0249005	0.000836	1.37898	0.207964	0.027	0.12	0.011	0.087	0.0339	0.086	0.0047654	0.0006202	0.0910375	3.84319	0.034816	0.0062886	9.78756e-07	7.84361	0.0618735	96.5719	0.283771	15.8324	0.124354	0.124369
12	287.324	0.219201	35.1216	0.139227	0.465257	0.0910063	36.0877	0.0924018	0.0482031	0.0009199	1.37147	0.208058	0.027	0.12	0.011	0.087	0.0339	0.086	0.004758	0.0006204	0.187205	3.77935	0.0178353	0.0004644	5.01391e-07	7.93232	0.0330728	96.879	0.143758	16.0107	0.0664636	0.0664933
CAT15-KS13 (lat=38.364753, long=37.611392), whole rock, J =0.0011077 ± 0.0000001
1.1	29.6422	0.216641	2.14386	0.126725	0.0717073	0.0925782	3.22781	0.0909325	0.0384985	0.0010853	1.36403	0.208167	0.027	0.12	0.011	0.087	0.0339	0.086	0.004751	0.0006208	0.0114272	5.53978	0.362748	0.0500656	1.02e-05	8.70367	0.546574	62.8634	1.39375	17.5602	1.09747	1.09747	16.05	0.06
1.2	42.8347	0.216349	4.66844	0.134436	-0.0557833	0.0922448	6.51794	0.0903149	0.0175768	0.0010125	1.34948	0.208429	0.027	0.12	0.011	0.087	0.0339	0.086	0.0047383	0.0006215	0.0248837	5.1407	0.164281	-0.0738189	4.61831e-06	8.2712	0.25154	90.033	0.980449	16.6916	0.50531	0.505314
1.3	47.1612	0.214971	5.40323	0.125505	-0.0406506	0.092921	7.1934	0.0900201	0.0135634	0.000758	1.34227	0.208587	0.027	0.12	0.011	0.087	0.0339	0.086	0.0047325	0.000622	0.0288003	4.9036	0.129379	-0.0603147	3.63712e-06	8.18853	0.19909	93.7047	0.788444	16.5255	0.39998	0.399986
1.4	74.9504	0.218946	8.58241	0.125801	0.0026705	0.0910063	11.5205	0.0916021	0.0171446	0.0009657	1.33515	0.208762	0.027	0.12	0.011	0.087	0.0339	0.086	0.0047272	0.0006225	0.045746	4.94594	0.0824767	-0.0373166	2.31861e-06	8.34841	0.129648	95.482	0.558384	16.8467	0.260424	0.260433
1.5	90.1178	0.219131	10.8482	0.135808	-0.0507391	0.0913014	14.639	0.0912754	0.016492	0.0009277	1.32811	0.208955	0.027	0.12	0.011	0.087	0.0339	0.086	0.0047222	0.0006231	0.0578229	4.97385	0.0695627	-0.0515171	1.95556e-06	8.06587	0.106275	96.9788	0.458055	16.2791	0.21354	0.21355
1.6	89.1522	0.216797	10.5553	0.126728	0.251322	0.0922448	14.7293	0.0909512	0.0190691	0.000785	1.3211	0.20917	0.027	0.12	0.011	0.087	0.0339	0.086	0.0047177	0.0006238	0.0562618	5.14515	0.0694644	0.0309315	1.9528e-06	8.12743	0.102342	96.1056	0.42836	16.4028	0.205623	0.205634
1.7	94.2105	0.217823	11.2621	0.128061	0.211759	0.0919208	15.5456	0.0897516	0.0147927	0.0007996	1.28347	0.210765	0.027	0.12	0.011	0.087	0.0339	0.086	0.0046999	0.0006285	0.0600291	5.09944	0.0650318	0.0166808	1.82819e-06	8.19174	0.0976426	97.8044	0.411589	16.532	0.196168	0.196179
1.8	128.24	0.219491	15.5305	0.133996	0.0436178	0.0922448	19.8397	0.0909671	0.0179777	0.0010255	1.27694	0.211131	0.027	0.12	0.011	0.087	0.0339	0.086	0.004698	0.0006296	0.0827808	4.72099	0.0461268	-0.0296293	1.29673e-06	8.11355	0.0742188	98.1485	0.339087	16.3749	0.149121	0.149135
1.9	129.994	0.214564	16.0835	0.137716	0.10672	0.0925782	18.0404	0.0912854	0.0151783	0.000986	1.27052	0.211523	0.027	0.12	0.011	0.087	0.0339	0.086	0.0046966	0.0006308	0.0857283	4.1467	0.0412429	-0.0184498	1.15943e-06	7.97765	0.072078	98.6089	0.324666	16.1018	0.144842	0.144855
2	106.391	0.215499	13.2426	0.124941	0.141931	0.0925782	13.4783	0.0919498	0.0095338	0.0009246	1.26418	0.21194	0.027	0.12	0.011	0.087	0.0339	0.086	0.0046956	0.000632	0.0705858	3.76399	0.0438236	-0.0065131	1.23198e-06	7.97958	0.0799043	99.2385	0.386213	16.1057	0.160568	0.160581
2.5	352.406	0.22803	43.2274	0.126776	0.573955	0.0913014	38.7717	0.0917247	0.0494878	0.0009586	1.2579	0.212388	0.027	0.12	0.011	0.087	0.0339	0.086	0.004695	0.0006334	0.230411	3.31814	0.0125028	0.0006508	3.51482e-07	7.95194	0.0248729	97.4706	0.122267	16.0501	0.0499839	0.0500236
3	427.284	0.229681	52.6354	0.138269	0.61688	0.092921	37.5536	0.0920593	0.0473048	0.0013027	1.24552	0.213374	0.027	0.12	0.011	0.087	0.0339	0.086	0.0046951	0.0006363	0.280558	2.6413	0.0094904	-0.0037698	2.66795e-07	7.96162	0.022651	98.0239	0.118627	16.0696	0.0455183	0.045562
3.5	337.132	0.228034	41.0437	0.134929	0.568911	0.0919208	25.3422	0.0913139	0.0451354	0.0009368	1.23946	0.213912	0.027	0.12	0.011	0.087	0.0339	0.086	0.0046957	0.0006379	0.218771	2.28662	0.0111531	0.0023081	3.13539e-07	7.98252	0.0277121	97.1406	0.125986	16.1116	0.0556875	0.0557234
4	214.752	0.227546	26.3114	0.139719	0.352107	0.0925782	17.0192	0.0912822	0.0346211	0.0008687	1.2335	0.214479	0.027	0.12	0.011	0.087	0.0339	0.086	0.0046968	0.0006396	0.140245	2.3963	0.0180862	0.000808	5.08443e-07	7.87062	0.0438485	96.3866	0.190724	15.8867	0.0881244	0.0881464
5	147.755	0.224116	17.2119	0.135812	0.181296	0.0916063	20.5219	0.0916279	0.0538841	0.0009037	1.2276	0.21508	0.027	0.12	0.011	0.087	0.0339	0.086	0.0046982	0.0006414	0.0917431	4.41862	0.0400602	-0.008329	1.12618e-06	7.83841	0.0652334	91.2146	0.275424	15.822	0.131107	0.131122
6	80.611	0.218377	8.51992	0.12705	0.280796	0.0919208	19.9351	0.0906525	0.049709	0.0009654	1.22178	0.215714	0.027	0.12	0.011	0.087	0.0339	0.086	0.0047001	0.0006433	0.045413	8.67424	0.135232	0.0554537	3.80166e-06	8.09263	0.128304	85.3395	0.505811	16.3329	0.257796	0.257804
8	100.523	0.224679	10.5845	0.125802	0.0083082	0.0916063	45.3181	0.0914405	0.0885593	0.0014229	1.21267	0.216794	0.027	0.12	0.011	0.087	0.0339	0.086	0.004704	0.0006465	0.0564176	15.8815	0.19146	-0.0387977	5.38236e-06	7.68108	0.102635	80.5279	0.513879	15.5058	0.206314	0.206323
10	73.3106	0.220985	7.94528	0.126411	0.126996	0.0922448	29.2837	0.0910089	0.0546309	0.0009726	1.20706	0.217516	0.027	0.12	0.011	0.087	0.0339	0.086	0.0047069	0.0006486	0.04235	13.676	0.221699	0.0059583	6.23246e-06	7.76159	0.132399	83.8085	0.56056	15.6676	0.266121	0.266128
12	221.086	0.227466	24.4164	0.136761	0.238464	0.0916063	83.1253	0.0936253	0.148173	0.0013259	1.2015	0.218277	0.027	0.12	0.011	0.087	0.0339	0.086	0.0047102	0.0006509	0.130144	12.637	0.0721996	-0.0116862	2.02969e-06	7.78571	0.0479009	85.6925	0.229111	15.7161	0.0962776	0.0962974
CAT15-KS16 (lat=38.821272, long=38.234275), whole rock, J =0.0011077 ± 0.0000001
1.1	3.4158	0.265754	-0.0537481	0.127048	0.0722018	0.0910063	0.202735	0.0906165	0.0110016	0.0009591	1.327	0.26	0.027	0.12	0.011	0.087	0.0339	0.086	0.004508	0.00088	-0.00028649	-14.1184	33.9639	-3.82112	0.0009548	-3.03	10.1647	4.78812	11.4502	-6.15296	20.676	20.676	10.95	0.03
1.2	26.2141	0.265347	0.788041	0.125217	0.186538	0.0919208	0.886559	0.0903111	0.0801169	0.0012781	1.327	0.26	0.027	0.12	0.011	0.087	0.0339	0.086	0.004508	0.00088	0.00420044	4.21241	0.795072	0.593549	2.24e-05	3.09068	0.768558	9.28206	1.77635	6.25495	1.55276	1.55276
1.3	51.0677	0.264577	1.33297	0.1261	0.118688	0.0922448	1.46414	0.0915904	0.151077	0.0014557	1.327	0.26	0.027	0.12	0.011	0.087	0.0339	0.086	0.004508	0.00088	0.00710505	4.11419	0.466603	0.159008	1.31e-05	4.64649	0.582924	12.1168	0.998734	9.39554	1.17569	1.17569
1.4	41.371	0.266391	1.25598	0.135342	0.232233	0.0916063	1.40654	0.0915904	0.116835	0.0013355	1.327	0.26	0.027	0.12	0.011	0.087	0.0339	0.086	0.004508	0.00088	0.00669465	4.20336	0.529227	0.448061	1.49e-05	5.34627	0.692043	16.2149	1.1643	10.8064	1.3947	1.3947
1.5	67.7854	0.265549	2.72019	0.127378	-0.0564757	0.0919208	2.70773	0.0912568	0.177774	0.0014804	1.327	0.26	0.027	0.12	0.011	0.087	0.0339	0.086	0.004508	0.00088	0.0144993	3.73752	0.215632	-0.133129	6.06191e-06	5.56389	0.322576	22.3088	0.765983	11.2449	0.649942	0.649944
1.6	53.2364	0.265549	3.11987	0.126409	0.16735	0.0922448	2.75489	0.0903117	0.123666	0.0013163	1.327	0.26	0.027	0.12	0.011	0.087	0.0339	0.086	0.004508	0.00088	0.0166297	3.31663	0.172858	0.0966264	4.85942e-06	5.36927	0.265689	31.4435	0.905043	10.8527	0.535438	0.53544
1.7	80.204	0.265149	6.02158	0.1258	0.145591	0.092921	5.2842	0.090619	0.148513	0.0014523	1.327	0.26	0.027	0.12	0.011	0.087	0.0339	0.086	0.004508	0.00088	0.0320964	3.29723	0.0891194	0.0193933	2.50535e-06	6.0951	0.152931	45.7283	0.65176	12.3149	0.307954	0.307958
1.8	69.076	0.263059	6.9498	0.125218	0.0597396	0.0922448	5.92815	0.0906197	0.0978642	0.0017159	1.327	0.26	0.027	0.12	0.011	0.087	0.0339	0.086	0.004508	0.00088	0.0370441	3.20611	0.0757553	-0.020004	2.12965e-06	5.86998	0.134495	59.0179	0.863768	11.8615	0.270896	0.2709
1.9	82.1344	0.266391	9.39301	0.12705	0.308786	0.0919208	7.36994	0.090316	0.097177	0.0012937	1.327	0.26	0.027	0.12	0.011	0.087	0.0339	0.086	0.004508	0.00088	0.0500669	2.95115	0.053864	0.0524156	1.51424e-06	5.7799	0.09287	66.0592	0.610463	11.6801	0.187075	0.18708
2	92.7256	0.262909	11.8362	0.125221	0.147964	0.0925782	8.74359	0.0915971	0.0912123	0.001281	1.327	0.26	0.027	0.12	0.011	0.087	0.0339	0.086	0.004508	0.00088	0.0630898	2.77947	0.0413822	-0.0052199	1.16335e-06	5.65002	0.0715603	72.0806	0.540986	11.4184	0.14417	0.144177
2.5	256.04	0.270601	35.7297	0.127748	0.497995	0.0919208	25.5155	0.0909903	0.212244	0.00162	1.327	0.26	0.027	0.12	0.011	0.087	0.0339	0.086	0.004508	0.00088	0.190448	2.68788	0.0135733	-9.36e-05	3.81575e-07	5.5053	0.0251015	76.7836	0.231552	11.1268	0.050579	0.0505979
3	433.159	0.272927	64.4483	0.13685	0.856432	0.0913014	42.4926	0.0917517	0.303756	0.0027333	1.327	0.26	0.027	0.12	0.011	0.087	0.0339	0.086	0.004508	0.00088	0.343525	2.4825	0.007518	-0.0013165	2.11348e-07	5.41789	0.0176598	80.5725	0.205414	10.9507	0.0355875	0.0356136
3.5	505.002	0.277157	85.4668	0.137408	1.09954	0.092921	55.5949	0.0925603	0.171878	0.0015571	1.327	0.26	0.027	0.12	0.011	0.087	0.0339	0.086	0.004508	0.00088	0.455558	2.45006	0.0056706	-0.0010687	1.59412e-07	5.41099	0.0108057	91.5328	0.119152	10.9368	0.0217756	0.021818
4	396.083	0.272325	68.2242	0.138316	0.929722	0.092921	50.3843	0.0918171	0.109024	0.0012857	1.327	0.26	0.027	0.12	0.011	0.087	0.0339	0.086	0.004508	0.00088	0.363652	2.78353	0.0075879	0.0013864	2.13314e-07	5.44533	0.0130694	93.7414	0.136114	11.006	0.0263363	0.0263719
5	302.702	0.271737	50.4427	0.134951	0.757723	0.092921	47.1321	0.0917888	0.124268	0.0013104	1.327	0.26	0.027	0.12	0.011	0.087	0.0339	0.086	0.004508	0.00088	0.268872	3.52298	0.0116578	0.0049974	3.27728e-07	5.41359	0.0173567	90.1428	0.178025	10.942	0.034977	0.0350035
6	204.216	0.267761	33.293	0.136774	0.388802	0.0925782	36.1874	0.0910496	0.101819	0.0013053	1.327	0.26	0.027	0.12	0.011	0.087	0.0339	0.086	0.004508	0.00088	0.17746	4.09965	0.0197498	-0.0049881	5.55212e-07	5.39337	0.0263942	87.8448	0.259598	10.9013	0.0531904	0.0532076
8	269.914	0.269	41.7662	0.126772	0.502643	0.0925782	95.7554	0.0957913	0.201742	0.0017514	1.327	0.26	0.027	0.12	0.011	0.087	0.0339	0.086	0.004508	0.00088	0.222624	8.65032	0.0276455	-0.004662	7.77176e-07	5.38591	0.0218596	83.154	0.237131	10.8863	0.0440525	0.0440733
10	99.7812	0.26706	14.5318	0.135348	0.306215	0.0922448	71.0365	0.0930932	0.115765	0.0013482	1.327	0.26	0.027	0.12	0.011	0.087	0.0339	0.086	0.004508	0.00088	0.0774578	18.4505	0.173539	0.0203887	4.87857e-06	5.26869	0.0599713	76.3439	0.532795	10.65	0.120872	0.12088
12	60.7225	0.262909	8.46498	0.125801	0.0400572	0.093273	62.2533	0.0922784	0.086049	0.0012557	1.327	0.26	0.027	0.12	0.011	0.087	0.0339	0.086	0.004508	0.00088	0.0451204	27.7768	0.414848	-0.0276536	1.17e-05	5.31432	0.0970415	73.5121	0.828364	10.742	0.195578	0.195583
CAT15-KS19 (lat=38.777839, long=38.266006), whole rock, J =0.0011132 ± 0.0000002
1.1	2.4968	0.265347	0.380012	0.127378	0.004253	0.0940043	1.20056	0.0912563	0.0022625	0.0009287	1.327	0.26	0.027	0.12	0.011	0.087	0.0339	0.086	0.004508	0.00088	0.00202556	11.9367	4.10268	-0.0075318	0.0001153	5.29732	2.05007	80.3683	17.5937	10.7607	4.15219	4.15219	10.87	0.04
1.2	1.4454	0.265549	0.1681	0.133551	-0.184856	0.0913014	0.596094	0.0912562	0.0009289	0.0009744	1.327	0.26	0.027	0.12	0.011	0.087	0.0339	0.086	0.004508	0.00088	0.000896011	13.4029	10.8442	-3.22804	0.0003049	7.50124	6.42895	86.9247	31.6019	15.2191	12.9895	12.9895
1.3	3.6864	0.265149	0.371269	0.125799	0.111468	0.0925782	0.544991	0.0912562	0.0113452	0.0009803	1.327	0.26	0.027	0.12	0.011	0.087	0.0339	0.086	0.004508	0.00088	0.00197896	5.55012	2.09767	0.816685	5.9e-05	1.03961	1.12277	10.4561	10.7464	2.11681	2.28481	2.28481
1.4	25.7315	0.265549	1.07625	0.135805	-0.0683444	0.0922448	1.96217	0.0894539	0.0787547	0.0011587	1.327	0.26	0.027	0.12	0.011	0.087	0.0339	0.086	0.004508	0.00088	0.0057367	6.89563	0.925158	-0.261144	2.6e-05	2.34538	0.502892	9.79278	1.69876	4.77209	1.02189	1.02189
1.5	36.9712	0.264214	1.13795	0.126409	0.176647	0.0922448	2.15702	0.090932	0.108608	0.0013908	1.327	0.26	0.027	0.12	0.011	0.087	0.0339	0.086	0.004508	0.00088	0.00606556	7.17342	0.85231	0.360886	2.4e-05	4.29766	0.645594	13.2039	1.33511	8.7349	1.30903	1.30903
1.6	45.8651	0.262909	1.60618	0.125504	0.152415	0.0913014	2.6644	0.0903117	0.126685	0.0014106	1.327	0.26	0.027	0.12	0.011	0.087	0.0339	0.086	0.004508	0.00088	0.00856136	6.27987	0.534876	0.194948	1.5e-05	5.2732	0.51608	18.4378	1.08809	10.7119	1.04529	1.04529
1.7	71.3636	0.261842	2.46317	0.127378	-0.0103852	0.0916063	4.02467	0.0915916	0.190108	0.0016579	1.327	0.26	0.027	0.12	0.011	0.087	0.0339	0.086	0.004508	0.00088	0.0131293	6.18774	0.3496	-0.0914837	9.82805e-06	6.19102	0.393393	21.336	0.788874	12.5699	0.795988	0.795991
1.8	63.7715	0.26661	3.06593	0.135805	0.066663	0.0936342	4.24001	0.0915918	0.149275	0.001425	1.327	0.26	0.027	0.12	0.011	0.087	0.0339	0.086	0.004508	0.00088	0.0163422	5.23905	0.258189	-0.0006926	7.25826e-06	6.48596	0.33122	31.1429	0.798368	13.1666	0.669969	0.669973
1.9	60.6366	0.262214	4.00657	0.13399	0.0662674	0.0919208	4.63011	0.0906184	0.125836	0.001374	1.327	0.26	0.027	0.12	0.011	0.087	0.0339	0.086	0.004508	0.00088	0.021356	4.37944	0.169697	-0.006379	4.77057e-06	5.94225	0.233252	39.2235	0.821017	12.0665	0.472089	0.472094
2	72.8509	0.265549	5.9422	0.136747	0.215715	0.093273	6.06619	0.0903144	0.124227	0.0014223	1.327	0.26	0.027	0.12	0.011	0.087	0.0339	0.086	0.004508	0.00088	0.0316734	3.87141	0.106111	0.0566331	2.98303e-06	6.18224	0.165567	50.3823	0.711932	12.5521	0.33501	0.335017
2.5	180.714	0.270054	18.4012	0.126734	0.0661685	0.0922448	17.9503	0.0912851	0.244219	0.0017467	1.327	0.26	0.027	0.12	0.011	0.087	0.0339	0.086	0.004508	0.00088	0.0980832	3.70063	0.0316823	-0.0340297	8.9066e-07	6.01423	0.0523674	61.1896	0.337904	12.2122	0.10598	0.106002
3	335.505	0.271162	41.3879	0.137268	0.288412	0.0916063	36.4373	0.0920519	0.363605	0.0022678	1.327	0.26	0.027	0.12	0.011	0.087	0.0339	0.086	0.004508	0.00088	0.220608	3.34099	0.0139293	-0.0218185	3.91583e-07	5.62385	0.0257146	69.3258	0.224929	11.422	0.0520633	0.0521011
3.5	480.259	0.271737	63.0089	0.136846	0.920227	0.0925783	48.4818	0.0924947	0.480198	0.0027361	1.327	0.26	0.027	0.12	0.011	0.087	0.0339	0.086	0.004508	0.00088	0.335853	2.921	0.008444	0.0009341	2.37381e-07	5.46937	0.0181512	71.7138	0.184238	11.1092	0.0367564	0.036807
4	763.459	0.278568	106.093	0.141005	1.32416	0.0922448	79.1875	0.0947279	0.687505	0.0036473	1.327	0.26	0.027	0.12	0.011	0.087	0.0339	0.086	0.004508	0.00088	0.565501	2.83451	0.0050685	-0.0046039	1.42487e-07	5.38031	0.0128331	74.7234	0.150283	10.9288	0.0259896	0.0260589
5	987.438	0.286356	153.541	0.139278	1.98496	0.0925783	133.869	0.0973766	0.630458	0.0032306	1.327	0.26	0.027	0.12	0.011	0.087	0.0339	0.086	0.004508	0.00088	0.818411	3.31747	0.0038573	-0.0019828	1.08439e-07	5.34456	0.0082476	83.0453	0.106031	10.8564	0.0167038	0.0168099
6	573.181	0.275136	90.7417	0.136953	1.0221	0.092921	112.608	0.0960911	0.355244	0.0022508	1.327	0.26	0.027	0.12	0.011	0.087	0.0339	0.086	0.004508	0.00088	0.483677	4.7235	0.0081895	-0.0066221	2.30227e-07	5.34673	0.0115097	84.551	0.13523	10.8608	0.0233103	0.0233866
8	398.802	0.26952	58.5015	0.142393	0.967009	0.0913014	132.63	0.0991252	0.364811	0.0022702	1.327	0.26	0.027	0.12	0.011	0.087	0.0339	0.086	0.004508	0.00088	0.311828	8.63228	0.0219792	0.0076007	6.17884e-07	5.31985	0.0182931	77.8641	0.194708	10.8064	0.0370498	0.0370973
10	207.623	0.268246	29.4141	0.126748	0.476631	0.092921	134.78	0.0982692	0.248879	0.0017551	1.327	0.26	0.027	0.12	0.011	0.087	0.0339	0.086	0.004508	0.00088	0.156785	17.4531	0.0762761	0.0059467	2.14429e-06	5.27078	0.0310845	74.316	0.309908	10.707	0.0629601	0.0629875
12	101.357	0.262762	14.4123	0.12772	0.0356064	0.0919208	74.3949	0.0924256	0.124507	0.0014974	1.327	0.26	0.027	0.12	0.011	0.087	0.0339	0.086	0.004508	0.00088	0.0768216	19.6682	0.176	-0.0338418	4.94776e-06	5.28544	0.0598357	74.75	0.554685	10.7367	0.121192	0.121207
CAT15-KS15 (lat=39.145219, long=37.813439), whole rock, J =0.0011077 ± 0.0000001
1.1	19.4347	0.226119	1.18077	0.125799	0.0704215	0.0922448	0.91403	0.0915903	0.0168256	0.0007686	1.19602	0.219075	0.027	0.12	0.011	0.087	0.0339	0.086	0.004714	0.0006533	0.00629375	2.87435	0.420399	0.127882	1.18e-05	12.3306	1.34291	74.8709	1.87405	24.8283	2.68576	2.68576			19.51	0.04
1.2	73.1171	0.228212	5.48877	0.125799	0.040255	0.092921	3.48095	0.0912572	0.0400848	0.0009317	1.19064	0.219909	0.027	0.12	0.011	0.087	0.0339	0.086	0.0047182	0.0006558	0.0292563	2.35569	0.0820305	-0.0200045	2.30606e-06	11.242	0.266065	84.3537	0.558454	22.6498	0.532752	0.53276
1.3	87.7357	0.224749	7.32832	0.126726	0.129963	0.0919208	4.26314	0.0909332	0.0283832	0.0008619	1.18013	0.221683	0.027	0.12	0.011	0.087	0.0339	0.086	0.0047277	0.0006611	0.0390615	2.16233	0.0593758	0.0120144	1.66919e-06	10.9085	0.194449	91.08	0.454287	21.9819	0.389494	0.389503
1.4	138.881	0.225525	12.6814	0.133555	0.0802132	0.0925782	6.9494	0.0912605	0.0334605	0.0010449	1.17497	0.222634	0.027	0.12	0.011	0.087	0.0339	0.086	0.0047331	0.0006639	0.0675945	2.03764	0.0343007	-0.0203969	9.64269e-07	10.2505	0.112217	93.5658	0.316303	20.6635	0.22494	0.224955
1.5	226.388	0.23374	21.3802	0.126113	0.221452	0.0922448	11.5567	0.0912682	0.0334209	0.000869	1.16986	0.22363	0.027	0.12	0.011	0.087	0.0339	0.086	0.0047389	0.0006669	0.113961	2.01057	0.0198184	-0.0081187	5.5714e-07	10.2076	0.0624335	96.3679	0.183766	20.5775	0.125154	0.12518
1.58667	244.687	0.235919	23.3053	0.126115	0.55724	0.0925782	12.5928	0.0903255	0.0281483	0.0008561	1.16484	0.224663	0.027	0.12	0.011	0.087	0.0339	0.086	0.0047451	0.00067	0.124222	2.01056	0.0180651	0.0313698	5.07851e-07	10.2245	0.0573511	97.35	0.170555	20.6113	0.114964	0.114993
1.7	332.24	0.237558	32.2969	0.138226	0.4342	0.0925782	17.0282	0.0912822	0.0319192	0.0008668	1.1599	0.225739	0.027	0.12	0.011	0.087	0.0339	0.086	0.0047517	0.0006732	0.172149	1.9625	0.0134619	0.0011411	3.78445e-07	10.0756	0.0445093	97.9113	0.127029	20.3128	0.0892365	0.0892721
1.8	431.639	0.273542	42.5914	0.134037	0.726073	0.0922448	22.1136	0.0909757	0.0381253	0.0010767	1.327	0.26	0.027	0.12	0.011	0.087	0.0339	0.086	0.004508	0.00088	0.227021	1.93392	0.0100171	0.011638	2.81602e-07	9.9495	0.0328739	98.1435	0.116101	20.06	0.0659179	0.0659648
1.9	457.336	0.275465	45.6896	0.126157	0.506303	0.0922448	23.7136	0.0919838	0.0339999	0.0010981	1.327	0.26	0.027	0.12	0.011	0.087	0.0339	0.086	0.004508	0.00088	0.243535	1.93389	0.0092079	-0.0055773	2.58855e-07	9.86966	0.0288493	98.5695	0.111087	19.8999	0.0578527	0.0579054
2	453.759	0.273232	46.0323	0.134489	0.448047	0.092921	23.8031	0.091641	0.027914	0.0010838	1.327	0.26	0.027	0.12	0.011	0.087	0.0339	0.086	0.004508	0.00088	0.245362	1.92741	0.0093152	-0.0094109	2.61871e-07	9.7582	0.0299881	98.9617	0.110957	19.6763	0.0601438	0.0601934
2.47917	1015.24	0.290689	103.24	0.137492	1.50378	0.0916063	56.7661	0.0918781	0.060448	0.0012084	1.327	0.26	0.027	0.12	0.011	0.087	0.0339	0.086	0.004508	0.00088	0.550291	2.0502	0.0042972	0.0046189	1.20805e-07	9.74625	0.0137727	99.0746	0.0541725	19.6524	0.0276228	0.0277301
3	1097.34	0.282312	112.413	0.137541	1.30299	0.0913015	58.3146	0.0925877	0.0660706	0.0011991	1.327	0.26	0.027	0.12	0.011	0.087	0.0339	0.086	0.004508	0.00088	0.599186	1.93493	0.0038785	-0.0040137	1.09034e-07	9.66834	0.0125424	99.0121	0.0491707	19.4961	0.0251575	0.0252735
3.5	688.992	0.282312	70.9541	0.137351	1.0316	0.0916063	39.9778	0.092076	0.0613812	0.001209	1.327	0.26	0.027	0.12	0.011	0.087	0.0339	0.086	0.004508	0.00088	0.378201	2.10304	0.0063273	0.004391	1.77874e-07	9.54164	0.0196019	98.2255	0.0780814	19.242	0.0393227	0.0393951
4	422.142	0.272325	43.3708	0.137757	0.492851	0.092921	29.9572	0.0913368	0.0607902	0.0011693	1.327	0.26	0.027	0.12	0.011	0.087	0.0339	0.086	0.004508	0.00088	0.231176	2.57906	0.011355	-0.0050813	3.19216e-07	9.42502	0.0316745	96.783	0.122404	19.008	0.0635492	0.063593
5	274.105	0.269785	27.545	0.136292	0.50749	0.0913014	27.2993	0.0916569	0.0817689	0.0012317	1.327	0.26	0.027	0.12	0.011	0.087	0.0339	0.086	0.004508	0.00088	0.146821	3.70184	0.0221354	0.014597	6.22276e-07	9.22392	0.0486315	92.6147	0.190176	18.6045	0.097592	0.0976193
6	194.237	0.268494	18.7604	0.12611	0.2985	0.090721	34.9235	0.0916993	0.107215	0.0014041	1.327	0.26	0.027	0.12	0.011	0.087	0.0339	0.086	0.004508	0.00088	0.099997	6.95562	0.050197	0.0059964	1.41115e-06	8.94732	0.0659411	86.2656	0.283601	18.0493	0.132369	0.132387
8	276.265	0.272029	25.3571	0.138216	0.265366	0.092921	72.6937	0.0927542	0.222043	0.0024507	1.327	0.26	0.027	0.12	0.011	0.087	0.0339	0.086	0.004508	0.00088	0.135159	10.7154	0.0599863	-0.011241	1.68635e-06	8.74322	0.0570924	80.0221	0.2951	17.6396	0.114631	0.114652
10	387.127	0.273232	32.2339	0.139728	0.562877	0.0916063	115.047	0.0978575	0.387342	0.0023173	1.327	0.26	0.027	0.12	0.011	0.087	0.0339	0.086	0.004508	0.00088	0.171814	13.35	0.0589733	0.0074149	1.65787e-06	9.00018	0.0458644	74.6702	0.202492	18.1554	0.0920616	0.0920892
12	127.132	0.267524	10.2332	0.125801	-0.0135502	0.0913014	41.8211	0.0917466	0.132347	0.0019162	1.327	0.26	0.027	0.12	0.011	0.087	0.0339	0.086	0.004508	0.00088	0.0545453	15.2916	0.190956	-0.0474436	5.36821e-06	9.225	0.129856	73.9464	0.522218	18.6066	0.26059	0.260601
FCT-A, sanidine, J = 0.0000565 ± 0.0000011
4	1574.53	0.554066	5.63795	0.0841802	-0.165898	0.0615927	-0.109642	0.0563449	0.0050768	0.0011262	2.9966	0.067	0.3464	0.054	0.161	0.038	0.0011	0.036	0.011901	0.00053	0.0171854	-0.0535815	0.0275471	-0.123229	7.98865e-07	278.963	4.16672	99.9029	0.0541329	28.6019	0.423889	0.695691
0	7024.27	1.30265	0.877731	0.0886352	-0.396987	0.0640604	0.161262	0.0568445	0.0765543	0.0020202	2.7752	0.083	0.0479	0.069	0.0084	0.043	0.0599	0.04	0.013469	0.00065	0.00267548	0.506591	0.185756	-1.39657	5.38691e-06	7977.11	805.684	99.6748	0.027556	680.531	57.4013	58.4547
4	2304.36	0.513175	8.2325	0.0937401	0.172525	0.0583871	0.190421	0.0617586	0.0084821	0.0011455	1.7299	0.057	0.4133	0.066	0.1525	0.042	-0.2196	0.043	0.005988	0.00057	0.0250949	0.0700986	0.0227489	0.0227952	6.59717e-07	279.569	3.18429	99.8911	0.0348018	28.6635	0.323934	0.640733
4	1558.05	0.364485	5.56115	0.127667	0.0513422	0.062656	0.324986	0.06036	0.00785	0.0010512	1.7299	0.057	0.4133	0.066	0.1525	0.042	-0.2196	0.043	0.005988	0.00057	0.0169519	0.177149	0.0331524	-0.0114036	9.6142e-07	279.725	6.42259	99.8519	0.0387152	28.6794	0.653357	0.856048
4	2603.62	0.592747	9.67214	0.0951624	-0.0199829	0.0590786	0.157814	0.0596728	0.0108198	0.0011543	1.7299	0.057	0.4133	0.066	0.1525	0.042	-0.2196	0.043	0.005988	0.00057	0.0294833	0.0494734	0.0187133	-0.0440102	5.42685e-07	268.818	2.64585	99.8765	0.0347937	27.5695	0.269319	0.596174
4	1892.78	0.449515	7.4705	0.139273	0.17302	0.0591836	-0.145992	0.0568655	0.0050818	0.0011868	1.6991	0.092	0.0934	0.072	-0.0876	0.039	0.1285	0.041	0.008867	0.00072	0.0227722	-0.0594677	0.0231898	0.02937	6.72504e-07	253.117	4.71941	99.919	0.0384405	25.9706	0.480807	0.694568
4	661.816	0.202149	2.25577	0.0954012	-0.216053	0.0637682	0.0073883	0.06111	0.0008177	0.0010272	1.6991	0.092	0.0934	0.072	-0.0876	0.039	0.1285	0.041	0.008867	0.00072	0.00687623	0.0099692	0.0824586	-0.315322	2.3913e-06	293.233	12.4025	99.9627	0.0633535	30.053	1.26074	1.3875
4	886.864	0.238462	3.11085	0.121091	-0.105949	0.0599313	-0.282134	0.0575525	0.0014899	0.0011708	1.6991	0.092	0.0934	0.072	-0.0876	0.039	0.1285	0.041	0.008867	0.00072	0.00948275	-0.276122	0.0573424	-0.136439	1.66293e-06	284.862	11.0882	99.9461	0.0547652	29.2019	1.12765	1.26044
4	595.88	0.186215	2.27872	0.0932416	-0.0975402	0.0661118	0.144515	0.0540583	0.0035337	0.0011269	1.6633	0.076	-0.2146	0.07	0.2	0.047	-0.1001	0.039	0.007708	0.0007	0.00694619	0.193773	0.0729166	-0.162364	2.11458e-06	261.016	10.6824	99.8254	0.0716865	26.7752	1.08783	1.20429
4	282.632	0.142042	1.61618	0.0945659	-0.0884391	0.0608069	0.318188	0.056858	0.0001565	0.0009846	1.6633	0.076	-0.2146	0.07	0.2	0.047	-0.1001	0.039	0.007708	0.0007	0.00492657	0.601699	0.113137	-0.1961	3.28097e-06	174.876	10.2365	99.9956	0.125995	17.9822	1.04744	1.10368
4	557.05	0.186215	2.17938	0.0939009	-0.501649	0.0647356	-0.0109347	0.0561453	0.0053617	0.0010134	1.6633	0.076	-0.2146	0.07	0.2	0.047	-0.1001	0.039	0.007708	0.0007	0.00664336	-0.0153379	0.0787573	-0.706179	2.28396e-06	254.82	10.9804	99.7111	0.0719718	26.1441	1.11856	1.2271
FCT-B, sanidine, J = 0.0000617 ± 0.0000006
3.96471	4228.06	0.943398	17.3258	0.125163	-0.0695444	0.065465	0.407439	0.0528089	0.0240175	0.001454	1.3265	0.08	-0.5117	0.061	0.1354	0.044	-0.2406	0.04	0.008742	0.00064	0.0528139	0.0713406	0.0092609	-0.0498034	2.68567e-07	243.589	1.76077	99.8314	0.0331584	27.3135	0.195968	0.31235
4	3353.62	0.724431	13.3274	0.0947735	0.0539142	0.0625916	0.441031	0.0547841	0.0076553	0.0011568	1.3265	0.08	-0.5117	0.061	0.1354	0.044	-0.2406	0.04	0.008742	0.00064	0.0406256	0.100416	0.0124939	-0.0259895	3.62324e-07	251.434	1.78907	99.9333	0.0322292	28.1865	0.199023	0.320283
4	1764.33	0.368782	7.25403	0.0925073	0.127515	0.0647359	0.598845	0.0561488	0.0192818	0.0013644	1.3265	0.08	-0.5117	0.061	0.1354	0.044	-0.2406	0.04	0.008742	0.00064	0.0221123	0.250568	0.02371	0.0121188	6.87591e-07	242.419	3.09266	99.6775	0.0374725	27.1833	0.344228	0.420825
4	4332.13	0.994266	17.3468	0.115994	0.626691	0.0592854	0.0402907	0.0561768	0.0268809	0.0014287	1.5993	0.092	0.3483	0.066	-0.1038	0.038	-0.0267	0.038	0.007168	0.00058	0.0528779	0.0070748	0.0098645	0.0664959	2.8607e-07	249.236	1.66776	99.815	0.0338898	27.9419	0.185553	0.310356
4	2194.29	0.498562	8.36642	0.0966024	0.506794	0.0577807	0.0433446	0.0576433	0.0067383	0.001116	1.5993	0.092	0.3483	0.066	-0.1038	0.038	-0.0267	0.038	0.007168	0.00058	0.0255032	0.0157847	0.0209927	0.137791	6.08788e-07	261.995	3.02598	99.9088	0.0355275	29.3609	0.336405	0.425973
4	2598.61	0.518232	9.34488	0.104079	0.333279	0.0585295	0.283611	0.0561768	0.0222155	0.0013374	1.5993	0.092	0.3483	0.066	-0.1038	0.038	-0.0267	0.038	0.007168	0.00058	0.0284858	0.0924917	0.0183494	0.0647054	5.32133e-07	277.337	3.08974	99.7461	0.0320868	31.0657	0.343174	0.440615
4	796.788	0.23924	2.87044	0.0895084	0.109708	0.0613333	-0.0944715	0.0547451	0.0047919	0.0010111	1.1262	0.094	-0.1974	0.063	-0.1206	0.04	-0.0562	0.039	0.005437	0.00064	0.0087499	-0.100663	0.0584176	0.072493	1.69411e-06	277.029	8.63932	99.8192	0.0568849	31.0315	0.959578	0.998497
4	2854.5	0.696373	11.2639	0.0902221	0.394711	0.0591152	-0.142249	0.0575789	0.0263	0.0014539	1.1262	0.094	-0.1974	0.063	-0.1206	0.04	-0.0562	0.039	0.005437	0.00064	0.0343355	-0.0386359	0.0156419	0.0629181	4.53616e-07	252.679	2.02521	99.7245	0.0376607	28.3249	0.225275	0.338135
4	2405.62	0.489118	9.42585	0.0867344	0.265515	0.0591152	0.154858	0.0533809	0.0172782	0.0011907	1.1262	0.094	-0.1974	0.063	-0.1206	0.04	-0.0562	0.039	0.005437	0.00064	0.0287327	0.0502754	0.0173365	0.0432671	5.02758e-07	254.634	2.344	99.7864	0.0323032	28.5423	0.260705	0.364041
FCT-C, sanidine, J = 0.0000592 ± 0.0000013
4	1834.32	0.399586	7.045	0.094568	0.294104	0.061185	-0.217708	0.0640182	0.0048731	0.0011374	1.5077	0.087	0.0038	0.07	-0.0049	0.043	0.1806	0.048	0.007838	0.00065	0.0214751	-0.0938444	0.0276242	0.0832538	8.01101e-07	260.113	3.49229	99.9195	0.0359331	27.9509	0.37242	0.729078
4	2901.78	0.705386	10.9954	0.0972873	-0.0113764	0.0604853	0.248148	0.0646742	0.0131656	0.0012814	1.5077	0.087	0.0038	0.07	-0.0049	0.043	0.1806	0.048	0.007838	0.00065	0.0335171	0.0685527	0.017877	-0.0410617	5.18434e-07	263.518	2.3328	99.8654	0.0367983	28.3139	0.248721	0.681844
4	949.248	0.264705	3.56517	0.0945664	0.0564863	0.062608	-0.113583	0.0627319	0.0015862	0.0009794	1.5077	0.087	0.0038	0.07	-0.0049	0.043	0.1806	0.048	0.007838	0.00065	0.0108676	-0.0967987	0.0535238	0.008282	1.55219e-06	266.07	7.05816	99.9488	0.050039	28.586	0.752423	0.988389
4	562.161	0.18918	2.21425	0.0881397	-0.185188	0.0590786	0.354145	0.0584125	0.008457	0.0011634	1.5738	0.083	-0.0588	0.064	0.0368	0.042	-0.2548	0.044	0.005747	0.00078	0.00674965	0.487677	0.0827465	-0.281979	2.39965e-06	252.762	10.0646	99.5574	0.077937	27.1668	1.07375	1.2346
4	345.977	0.154237	1.68681	0.0867855	0.32398	0.0619254	0.473638	0.0624589	0.002427	0.0009854	1.5738	0.083	-0.0588	0.064	0.0368	0.042	-0.2548	0.044	0.005747	0.00078	0.00514188	0.856383	0.121222	0.518755	3.51545e-06	204.738	10.5385	99.8071	0.105841	22.0361	1.12747	1.23132
4	488.212	0.18918	2.29303	0.0916261	0.0324475	0.0604864	0.0988059	0.0610764	0.0021792	0.001105	1.5738	0.083	-0.0588	0.064	0.0368	0.042	-0.2548	0.044	0.005747	0.00078	0.0069898	0.131454	0.0814271	0.0031069	2.36139e-06	212.608	8.49752	99.869	0.086992	22.878	0.908694	1.04386
FCT-D sanidine, J = 0.0000598 ± 0.0000003
3.98667	5608.48	1.2033	21.5324	0.0994359	0.0712261	0.0576739	0.0831428	0.0568445	0.0639015	0.0019936	1.2547	0.089	-0.0689	0.068	0.2721	0.04	-0.0817	0.04	0.00777	0.00057	0.0656367	0.011738	0.0080254	-0.0294413	2.32737e-07	259.542	1.20018	99.6599	0.0320959	28.1749	0.12929	0.184658
4	3553.22	0.765193	13.587	0.0979843	-0.161644	0.0576739	0.0178304	0.0541158	0.0146485	0.0013327	1.2547	0.089	-0.0689	0.068	0.2721	0.04	-0.0817	0.04	0.00777	0.00057	0.041417	0.0039903	0.0121106	-0.0724957	3.51208e-07	261.154	1.88441	99.8768	0.0324316	28.3485	0.202979	0.24248
4	4140.57	0.934249	15.8815	0.0924307	-0.247016	0.0591152	0.156829	0.0589809	0.0179093	0.0014241	1.2547	0.089	-0.0689	0.068	0.2721	0.04	-0.0817	0.04	0.00777	0.00057	0.0484113	0.0300337	0.0112966	-0.0831245	3.27601e-07	260.342	1.51659	99.8711	0.0335018	28.2611	0.163366	0.210183
4	4861.69	1.00387	18.631	0.0931733	-0.255821	0.0597785	0.250709	0.0596517	0.0092657	0.0015124	1.4467	0.088	0.063	0.069	0.1625	0.042	0.0756	0.042	0.005645	0.00056	0.0567924	0.0410733	0.0097748	-0.077494	2.83469e-07	260.762	1.30543	99.9435	0.0306352	28.3063	0.140617	0.193177
4	3064.07	0.665841	11.7204	0.089902	-0.179747	0.0590786	0.0606824	0.0582691	0.0174628	0.0012383	1.4467	0.088	0.063	0.069	0.1625	0.042	0.0756	0.042	0.005645	0.00056	0.035727	0.0158073	0.0151792	-0.0826929	4.40196e-07	260.947	2.00268	99.8299	0.0329918	28.3262	0.21572	0.253187
4	2923.9	0.65593	11.1869	0.0972681	-0.324969	0.0597785	-0.116932	0.0589562	0.0101285	0.0013281	1.4467	0.088	0.063	0.069	0.1625	0.042	0.0756	0.042	0.005645	0.00056	0.0341007	-0.0319207	0.0160966	-0.122137	4.66801e-07	261.053	2.27082	99.8959	0.0344882	28.3376	0.244602	0.278232
4	3487.31	0.744752	13.7807	0.0925133	0.0812176	0.0626535	-0.0701394	0.0583877	0.0074677	0.0012966	1.5177	0.084	-0.4054	0.061	0.0419	0.046	0.0528	0.038	0.008837	0.00068	0.0420076	-0.0155832	0.0129726	-0.0206187	3.76207e-07	252.853	1.69855	99.9358	0.032169	27.4542	0.183048	0.223647
4	3886.97	0.804398	15.3453	0.0978504	0.164908	0.0626535	-0.0826502	0.0554553	0.0100462	0.0013831	1.5177	0.084	-0.4054	0.061	0.0419	0.046	0.0528	0.038	0.008837	0.00068	0.0467767	-0.0164949	0.011068	-0.0066089	3.20971e-07	253.064	1.61475	99.9226	0.0311251	27.4769	0.174015	0.216379
3.9625	2270.93	0.507007	9.15563	0.0881154	0.330014	0.0661116	-0.145401	0.0569063	0.0073874	0.0012966	1.5177	0.084	-0.4054	0.061	0.0419	0.046	0.0528	0.038	0.008837	0.00068	0.027909	-0.0486485	0.0190455	0.0666606	5.52319e-07	247.75	2.38538	99.9023	0.0358693	26.9042	0.257143	0.286328
4	4993.45	1.1032	19.3394	0.0839298	0.125041	0.0668256	0.135649	0.054742	0.0268318	0.0018373	1.5177	0.084	-0.4054	0.061	0.0419	0.046	0.0528	0.038	0.008837	0.00068	0.058952	0.0214919	0.0086737	-0.0194205	2.51537e-07	257.748	1.12041	99.8398	0.0330957	27.9816	0.120708	0.178094
FCT-A, sanidine, J =0.0011077 ± 0.0000001
12	3272.32	0.404109	232.897	0.150888	3.02624	0.091921	1.09678	0.0906166	0.0264272	0.001593	3.04165	0.233247	0.027	0.12	0.011	0.087	0.0339	0.086	0.0094011	0.0006956	1.24137	0.0165327	0.001366	0.0002034	3.84009e-08	14.0145	0.0094671	99.7637	0.0227092	28.1928	0.0188989	0.0192183
12	12071.2	0.560246	854.535	0.18337	11.0456	0.0932758	3.73479	0.0897308	0.445323	0.003527	3.02413	0.231895	0.027	0.12	0.011	0.087	0.0339	0.086	0.0093388	0.0006915	4.55476	0.0153489	0.0003688	-0.0002169	1.03673e-08	13.9682	0.0033064	98.903	0.010896	28.1005	0.0066009	0.007461
12	2852.43	0.298783	187.371	0.140562	2.74238	0.0936343	0.718778	0.0906165	0.80263	0.0038424	3.00667	0.230589	0.027	0.12	0.011	0.087	0.0339	0.086	0.009277	0.0006876	0.998707	0.0134768	0.001699	0.0026843	4.7764e-08	13.9422	0.0122237	91.6027	0.0426561	28.0486	0.0244038	0.0246495
12	3492.16	0.317796	228.865	0.144099	3.27331	0.092245	1.01289	0.0912562	0.91915	0.0042215	2.98938	0.229335	0.027	0.12	0.011	0.087	0.0339	0.086	0.0092159	0.0006839	1.21987	0.0155534	0.0014013	0.0018631	3.93944e-08	14.0574	0.0105161	92.146	0.038156	28.2785	0.0209921	0.0212819
12	7069.06	0.417775	500.531	0.1582	6.43496	0.0922457	2.25431	0.091934	0.196724	0.0024554	2.972	0.228114	0.027	0.12	0.011	0.087	0.0339	0.086	0.0091546	0.0006802	2.66789	0.0158335	0.0006457	-0.0003486	1.81531e-08	14.0036	0.0047363	99.1737	0.013299	28.1711	0.009455	0.0100774
12	9649.99	0.485903	687.703	0.172014	8.94719	0.09258	2.64599	0.0909322	0.0333635	0.0021533	2.94472	0.226279	0.027	0.12	0.011	0.087	0.0339	0.086	0.0090587	0.0006748	3.66553	0.013534	0.0004651	0.0002861	1.30756e-08	14.0154	0.0036964	99.9007	0.0097499	28.1947	0.007379	0.0081625
12	4758.78	0.33646	338.494	0.157054	4.34744	0.0932735	1.44642	0.0909317	0.0321133	0.0016767	2.92761	0.225178	0.027	0.12	0.011	0.087	0.0339	0.086	0.0089988	0.0006715	1.80421	0.015036	0.0009453	-0.0002227	2.65743e-08	14.0281	0.0067484	99.8029	0.0145095	28.2201	0.0134716	0.0139169
12	2511.09	0.281301	178.316	0.14469	2.37188	0.0929211	0.830829	0.0909316	0.0367045	0.0014933	2.9106	0.224122	0.027	0.12	0.011	0.087	0.0339	0.086	0.0089393	0.0006683	0.950444	0.0164007	0.0017951	0.0010448	5.0463e-08	14.0186	0.0117533	99.5684	0.0237789	28.2011	0.0234629	0.023721
12	4779.92	0.342603	327.995	0.153868	4.26693	0.0916067	1.30798	0.0909317	0.614104	0.0039972	2.89368	0.223107	0.027	0.12	0.011	0.087	0.0339	0.086	0.0088803	0.0006653	1.74825	0.0140419	0.0009762	-0.0007145	2.74439e-08	14.0119	0.0075851	96.1681	0.026876	28.1876	0.0151421	0.0155387
12	3668.78	0.327022	260.226	0.14554	3.51089	0.091921	0.912061	0.0909316	0.0724313	0.0019725	2.87682	0.222134	0.027	0.12	0.011	0.087	0.0339	0.086	0.0088217	0.0006624	1.38703	0.0123458	0.0012309	0.0015563	3.46028e-08	14.013	0.0082538	99.4142	0.0203904	28.1899	0.016477	0.0168423
12	5511.9	0.380319	391.986	0.150846	5.11832	0.0929216	1.43106	0.0906167	0.066559	0.001686	2.8436	0.220324	0.027	0.12	0.011	0.087	0.0339	0.086	0.0087067	0.000657	2.08933	0.0128686	0.0008149	0.0003564	2.29079e-08	14.0084	0.0056261	99.6432	0.0133543	28.1808	0.0112313	0.0117604
12	3334.72	0.317902	236.176	0.146355	3.09479	0.092245	0.965329	0.0903111	0.0779149	0.0017845	2.82672	0.219458	0.027	0.12	0.011	0.087	0.0339	0.086	0.0086484	0.0006544	1.25885	0.0144125	0.0013484	0.0004033	3.79061e-08	14.0189	0.009076	99.3066	0.0208786	28.2016	0.0181181	0.0184512
12	2541.04	0.270933	180.582	0.144166	2.16576	0.0925783	0.490542	0.0912562	0.019157	0.0013899	2.81017	0.218643	0.027	0.12	0.011	0.087	0.0339	0.086	0.0085915	0.000652	0.962525	0.0095819	0.0017826	-0.0026945	5.01115e-08	14.0372	0.011538	99.7776	0.0222227	28.2382	0.0230325	0.0232961
12	4379.77	0.360694	311.394	0.148986	4.00552	0.0922451	1.00314	0.0915903	0.019746	0.0016791	1.327	0.26	0.027	0.12	0.011	0.087	0.0339	0.086	0.004508	0.00088	1.65992	0.0147742	0.001349	-0.0001519	3.79223e-08	14.0425	0.0070055	99.8697	0.0163294	28.2488	0.0139846	0.0144149
12	989.27	0.282312	70.4139	0.137349	0.671872	0.092921	0.381445	0.0900153	0.0050899	0.0010075	1.327	0.26	0.027	0.12	0.011	0.087	0.0339	0.086	0.004508	0.00088	0.375349	0.0248531	0.0058652	-0.0097855	1.64883e-07	14.0246	0.0279784	99.853	0.0505367	28.213	0.055852	0.055961
12	4134.97	0.360694	294.224	0.147627	3.88733	0.0913018	0.831321	0.0906165	0.0265678	0.0016806	1.327	0.26	0.027	0.12	0.011	0.087	0.0339	0.086	0.004508	0.00088	1.56839	0.012988	0.0014158	0.000845	3.98e-08	14.0232	0.0073432	99.812	0.0173007	28.2103	0.014659	0.0150691
12	6315.77	0.412311	449.039	0.160169	5.81343	0.0932738	1.71473	0.0906167	0.0539965	0.0018652	1.327	0.26	0.027	0.12	0.011	0.087	0.0339	0.086	0.004508	0.00088	2.39366	0.0175596	0.000928	5.84e-05	2.60876e-08	14.0257	0.0052356	99.7498	0.0127611	28.2153	0.0104517	0.0110196
FCT-B, sanidine, J =0.0011132 ± 0.0000002
12	2886.86	0.295749	206.381	0.144404	2.53399	0.0916064	0.915999	0.0897295	0.0122175	0.0013873	2.79377	0.21787	0.027	0.12	0.011	0.087	0.0339	0.086	0.0085352	0.0006497	1.10004	0.0156613	0.0015342	-0.0018422	4.31294e-08	13.9681	0.01008	99.8781	0.0203891	28.2387	0.020222	0.020803
12	3909.49	0.316301	280.314	0.145256	3.58586	0.0932733	1.00668	0.0912562	0.019645	0.0014786	2.77742	0.217132	0.027	0.12	0.011	0.087	0.0339	0.086	0.0084793	0.0006475	1.49411	0.0126765	0.0011492	-0.0003578	3.23052e-08	13.9235	0.0074709	99.8537	0.0160732	28.1493	0.0149883	0.0157587
12	4222.01	0.345624	302.023	0.148292	3.83945	0.0919211	1.11046	0.0909316	0.0357983	0.0016667	2.74509	0.215768	0.027	0.12	0.011	0.087	0.0339	0.086	0.0083691	0.0006434	1.60982	0.0129873	0.0010635	-0.0006156	2.98974e-08	13.9414	0.0071332	99.7506	0.0165139	28.1851	0.0143107	0.0151176
12	2970	0.300638	212.773	0.146664	2.57572	0.0919209	0.724981	0.0912562	0.0240816	0.0014771	2.72899	0.215135	0.027	0.12	0.011	0.087	0.0339	0.086	0.0083145	0.0006415	1.13411	0.0120397	0.0015155	-0.0023726	4.26043e-08	13.9224	0.0099194	99.7613	0.0206187	28.147	0.0199007	0.0204871
12	3362.7	0.307286	240.467	0.144229	3.06235	0.092245	0.9544	0.0906165	0.010872	0.0014734	2.71291	0.214534	0.027	0.12	0.011	0.087	0.0339	0.086	0.0082601	0.0006398	1.28172	0.0140291	0.001332	-0.0005102	3.74466e-08	13.9682	0.0086703	99.9076	0.0183887	28.239	0.0173939	0.0180661
12	3593.64	0.314135	238.796	0.147499	3.14731	0.0932733	0.895519	0.0909316	0.861187	0.0039277	2.69689	0.213964	0.027	0.12	0.011	0.087	0.0339	0.086	0.008206	0.0006381	1.27281	0.0132604	0.0013465	-0.0011677	3.78529e-08	13.9699	0.010015	92.8488	0.0347454	28.2424	0.0200914	0.0206762
12	3255.82	0.292492	226.391	0.141975	2.86414	0.0925784	0.793807	0.0897295	0.0136806	0.0013814	2.681	0.213428	0.027	0.12	0.011	0.087	0.0339	0.086	0.0081526	0.0006365	1.20669	0.0124027	0.001402	-0.0007613	3.94128e-08	14.3609	0.0092791	99.878	0.01794	29.0265	0.0186071	0.0192717
12	3035.87	0.291774	217.009	0.142391	2.58453	0.0922449	0.740342	0.0912562	0.03849	0.0013877	2.64928	0.212443	0.027	0.12	0.011	0.087	0.0339	0.086	0.0080464	0.0006335	1.15668	0.0120759	0.0014885	-0.0029752	4.18456e-08	13.9343	0.0094368	99.6249	0.0192484	28.1708	0.0189323	0.0195488
12	3625.25	0.298399	259.567	0.147739	3.22287	0.0925785	0.932049	0.0912562	0.0178527	0.0012908	2.63358	0.211995	0.027	0.12	0.011	0.087	0.0339	0.086	0.0079941	0.0006322	1.38352	0.0127146	0.0012449	-0.001447	3.4997e-08	13.9436	0.0081558	99.8566	0.0157623	28.1896	0.0163621	0.0170725
12	2523.93	0.277783	179.805	0.143088	2.45456	0.0916064	0.730397	0.0909316	0.0409859	0.0010379	2.61789	0.211574	0.027	0.12	0.011	0.087	0.0339	0.086	0.0079419	0.0006309	0.958383	0.0143888	0.0017914	0.0020465	5.03598e-08	13.9667	0.0113534	99.5195	0.019802	28.2359	0.0227766	0.0232939
12	1778.78	0.253373	127.112	0.138601	1.61069	0.0922448	0.53229	0.0909316	0.0177068	0.0012895	2.60236	0.211182	0.027	0.12	0.011	0.087	0.0339	0.086	0.0078905	0.0006298	0.677523	0.0148381	0.0025349	-0.0007459	7.12606e-08	13.9499	0.0156375	99.7071	0.0295574	28.2022	0.0313717	0.0317483
12	3296.16	0.297563	235.375	0.139569	3.04068	0.091921	0.753437	0.0906165	0.0259101	0.0014719	2.58688	0.210816	0.027	0.12	0.011	0.087	0.0339	0.086	0.0078394	0.0006287	1.25458	0.0113463	0.0013646	-1.4e-05	3.83633e-08	13.9686	0.0085845	99.7686	0.0184537	28.2396	0.0172218	0.0179005
12	3238.53	0.310861	232.502	0.144676	3.06205	0.091921	0.947114	0.0912562	0.0063293	0.0012843	2.49595	0.209128	0.027	0.12	0.011	0.087	0.0339	0.086	0.0075426	0.0006236	1.23926	0.0144694	0.0013942	0.0007609	3.91936e-08	13.9186	0.0089177	99.9459	0.0180146	28.1395	0.0178911	0.0185408
12	1145.28	0.286356	81.8488	0.135056	1.17115	0.0922448	0.167682	0.090311	0.008939	0.0012289	1.327	0.26	0.027	0.12	0.011	0.087	0.0339	0.086	0.004508	0.00088	0.436305	0.0094239	0.0050756	0.0040136	1.42686e-07	13.9562	0.0237217	99.77	0.0477081	28.2149	0.0475897	0.047839
12	3448.67	0.340588	229.058	0.147958	2.97105	0.0916065	0.768207	0.0897295	0.816022	0.0039687	1.327	0.26	0.027	0.12	0.011	0.087	0.0339	0.086	0.004508	0.00088	1.22102	0.015438	0.0018032	-0.0017533	5.06932e-08	13.9887	0.0105172	92.9396	0.0369126	28.2801	0.0210985	0.0216577
12	2520.71	0.316228	172.01	0.141969	2.37336	0.0922449	0.683233	0.0906165	0.3963	0.0024088	1.327	0.26	0.027	0.12	0.011	0.087	0.0339	0.086	0.004508	0.00088	0.916917	0.0182905	0.0024259	0.0013329	6.81973e-08	13.9632	0.012397	95.3113	0.0333893	28.229	0.0248703	0.0253446
12	2846.03	0.322025	189.538	0.145336	2.7861	0.0916065	0.654384	0.0912562	0.678683	0.0033522	1.327	0.26	0.027	0.12	0.011	0.087	0.0339	0.086	0.004508	0.00088	1.01035	0.0159037	0.0022179	0.0032485	6.23492e-08	13.9431	0.0120447	92.8849	0.0384127	28.1885	0.024164	0.0246506
FCT-D, sanidine, J =0.0011305 ± 0.0000002
12	2527.88	0.27533	183.234	0.143651	2.22372	0.0922449	0.743886	0.0912562	0.0182872	0.001375	2.05969	0.208343	0.027	0.12	0.011	0.087	0.0339	0.086	0.0062177	0.0006213	0.976667	0.0145801	0.0017886	-0.0022772	5.02828e-08	13.7638	0.0111229	99.7882	0.0223782	28.2579	0.0226607	0.0229847
12	2522.66	0.275376	182.874	0.140019	2.3878	0.0922449	0.731185	0.0897295	0.0203753	0.0012857	2.04711	0.208403	0.027	0.12	0.011	0.087	0.0339	0.086	0.0061825	0.0006215	0.974746	0.0143644	0.0017628	0.0003873	4.95562e-08	13.759	0.0108471	99.7631	0.0216701	28.2481	0.0220989	0.0224308
12	4450.29	0.325509	322.201	0.144792	4.05487	0.0916066	1.13971	0.0909317	0.0831162	0.0018686	2.03462	0.208462	0.027	0.12	0.011	0.087	0.0339	0.086	0.0061477	0.0006216	1.71738	0.0127124	0.0010143	-0.001062	2.85136e-08	13.7327	0.0064888	99.4461	0.0162372	28.1947	0.0132201	0.0137657
12	3208.82	0.2823	233.059	0.14632	3.17807	0.0913017	0.828269	0.0909316	0.0124179	0.0011965	1.96135	0.208789	0.027	0.12	0.011	0.087	0.0339	0.086	0.0059481	0.0006226	1.24224	0.012799	0.0014052	0.0020984	3.95022e-08	13.75	0.0088512	99.8884	0.0166954	28.2299	0.0180328	0.0184375
12	4229.35	0.333486	300.58	0.148834	3.82531	0.0916066	1.36371	0.0900155	0.3076	0.0019913	1.94938	0.208837	0.027	0.12	0.011	0.087	0.0339	0.086	0.0059162	0.0006228	1.60214	0.0163449	0.0010789	-0.0010701	3.03308e-08	13.7628	0.0071823	97.8333	0.0178717	28.256	0.0146326	0.0151294
12	5020.39	0.341367	339.637	0.155847	4.65375	0.0947718	1.25353	0.0912563	1.1932	0.0052189	1.93749	0.208882	0.027	0.12	0.011	0.087	0.0339	0.086	0.0058847	0.0006229	1.81032	0.0133012	0.0009683	0.0003972	2.72222e-08	13.7303	0.0078579	92.9078	0.0323963	28.1898	0.0160095	0.0164627
12	5678.89	0.349355	412.44	0.155256	5.28567	0.0929216	1.5312	0.0906167	0.0332466	0.0019432	1.92562	0.208924	0.027	0.12	0.011	0.087	0.0339	0.086	0.0058536	0.000623	2.19837	0.0133842	0.0007921	-0.0002961	2.22677e-08	13.7426	0.0054276	99.8292	0.0134158	28.2147	0.0110579	0.0117056
12	7920.46	0.390596	574.534	0.162898	7.45093	0.0925795	2.0372	0.0906168	0.111055	0.0022683	1.91381	0.208963	0.027	0.12	0.011	0.087	0.0339	0.086	0.0058227	0.0006231	3.06236	0.0127877	0.0005688	8.59e-05	1.59909e-08	13.7258	0.0041228	99.5852	0.0110263	28.1805	0.0083997	0.0092338
11.9455	4324.32	0.310795	314.002	0.15487	3.84005	0.0922451	1.00471	0.0912562	0.066737	0.0011887	1.89042	0.20903	0.027	0.12	0.011	0.087	0.0339	0.086	0.0057623	0.0006233	1.67368	0.0115475	0.0010489	-0.0020681	2.94857e-08	13.7057	0.006925	99.5426	0.0130497	28.1396	0.0141092	0.0146197
12	3348.82	0.303489	243.327	0.14699	3.3193	0.0929213	1.05552	0.0903111	0.0282927	0.0014698	1.8789	0.209059	0.027	0.12	0.011	0.087	0.0339	0.086	0.0057329	0.0006234	1.29697	0.0156606	0.00134	0.0020787	3.76694e-08	13.7257	0.0085768	99.7525	0.0183228	28.1803	0.0174742	0.0178901
12	3957.91	0.303506	287.046	0.145885	3.70494	0.0919211	1.08851	0.0906166	0.0613727	0.0017627	1.86743	0.209083	0.027	0.12	0.011	0.087	0.0339	0.086	0.0057038	0.0006235	1.53	0.013695	0.0011401	-0.0001035	3.20511e-08	13.7222	0.0072883	99.5411	0.017146	28.1733	0.0148492	0.0153362
12	2220.13	0.269489	160.93	0.142404	2.24409	0.0929211	0.956566	0.0906165	0.0335607	0.0013803	1.85606	0.209104	0.027	0.12	0.011	0.087	0.0339	0.086	0.0056752	0.0006236	0.857782	0.0214739	0.0020343	0.0029076	5.71898e-08	13.7314	0.0125304	99.5552	0.0252651	28.1919	0.0255291	0.0258158
12	3028.54	0.282545	219.474	0.15075	2.59076	0.0916064	0.971532	0.0906166	0.0234561	0.0015612	1.84475	0.209121	0.027	0.12	0.011	0.087	0.0339	0.086	0.005647	0.0006236	1.16983	0.0159978	0.0014922	-0.0032422	4.19486e-08	13.7649	0.0097757	99.7733	0.020267	28.2601	0.019916	0.0202839
12	5428.57	0.349486	393.32	0.157928	5.10002	0.0925788	1.65831	0.0903113	0.0775231	0.0017713	1.82254	0.209142	0.027	0.12	0.011	0.087	0.0339	0.086	0.0055923	0.0006237	2.09646	0.0152477	0.0008304	7.8e-05	2.33448e-08	13.7408	0.005748	99.5782	0.0133234	28.2111	0.0117107	0.0123239
Note: Details of the analytical methods are provided in Cosca and Morgan (2018) All data corrected for blanks, radioactive decay, nucelogenic interferences, mass discrimination, and detector intercalibration. Ages calculated with decay constants in Min et al. (2000), atmospheric 40Ar/39Ar= 298.56 ±0.31 (Lee et al., 2006) and age of 28.201 ± 0.046 for Fish Canyon sanidine (Kuiper et al., 2008). Ar…
References cited:
Cosca, M.A., and Morgan, L.E., 2018, 40Ar/39Ar geochronology of the Tonopah, Divide, and Goldfield districts, Nevada: U.S. Geological Survey data release, https://doi.org/10.5066/F7833R8Z.
Kuiper, K.F., Deino, A., Hilgen, F.J., Krijgsman, W., Renne, P.R., and Wijbrans, J.R., 2008, Synchronizing rock clocks of earth history: Science, doi:10.1126/science.1154339.
Lee, J.Y., Marti, K., Severinghaus, J.P., Kawamura, K., Yoo, H.S., Lee, J.B., and Kim, J.S., 2006, A redetermination of the isotopic abundances of atmospheric Ar: Geochimica et Cosmochimica Acta, doi:10.1016/j.gca.2006.06.1563.
Min, K., Mundil, R., Renne, P.R., and Ludwig, K.R., 2000, A test for systematic errors in40Ar/39Ar geochronology through comparison with U/Pb analysis of a 1.1-Ga rhyolite: Geochimica et Cosmochimica Acta, doi:10.1016/S0016-7037(99)00204-5
